## Analysis

# The proliferative history shapes the DNA methylome of B-cell tumors and predicts clinical outcome

Martí Duran-Ferrer<sup>1,2,\*</sup>, Guillem Clot<sup>1,2</sup>, Ferran Nadeu<sup>1,2</sup>, Renée Beekman<sup>1,2</sup>, Tycho Baumann<sup>2,3</sup>, Jessica Nordlund<sup>4</sup>, Yanara Marinovic-Zuniga<sup>4</sup>, Gudmar Lönnnerholm<sup>5</sup>, Alfredo Rivas-Delgado<sup>1,3</sup>, Silvia Martin<sup>1,2</sup>, Raquel Ordoñez<sup>2,6</sup>, Giancarlo Castellano<sup>1</sup>, Marta Kulis<sup>1</sup>, Ana Queirós<sup>1</sup>, Lee Seung-Tae<sup>7</sup>, Joseph Wiemels<sup>8</sup>, Romina Royo<sup>9</sup>, Montserrat Puiggrós<sup>9</sup>, Junyan Lu<sup>10</sup>, Eva Gine<sup>1,2,3</sup>, Sílvia Beà<sup>1,2,13</sup>, Pedro Jares<sup>1,2,13</sup>, Xabier Agirre<sup>2,6</sup>, Felipe Prosper<sup>2,6,11</sup>, Carlos López-Otín<sup>2,12</sup>, Xosé S.Puente<sup>2,12</sup>, Christopher C. Oakes<sup>13</sup>, Thorsten Zenz<sup>13,14</sup>, Julio Delgado<sup>1,2,3</sup>, Armando López-Guillermo<sup>1,2,3</sup>, Elías Campo<sup>1,2,15</sup> and José Ignacio Martin-Subero<sup>1,2,15,16\*</sup>

<sup>1</sup>Institut d'Investigacions Biomèdiques August Pi i Sunyer (IDIBAPS), Barcelona, Spain.

<sup>2</sup>Centro de Investigación Biomédica en Red de Cáncer, CIBERONC, Spain.

<sup>3</sup>Servicio de Hematología, Hospital Clínic, IDIBAPS, Barcelona, Spain.

<sup>4</sup>Department of Medical Sciences, Molecular Medicine and Science for Life Laboratory, Uppsala University, Uppsala, Sweden

<sup>5</sup>Department of Women's and Children's Health, Pediatrics, Uppsala University, Uppsala, Sweden.

<sup>6</sup>Centro de Investigación Médica Aplicada (CIMA), IDISNA, Pamplona, Spain.

<sup>7</sup>Department of Laboratory Medicine, Yonsei University College of Medicine, Korea.

<sup>8</sup>Center for Genetic Epidemiology, University of Southern California, Los Angeles.

<sup>9</sup>Programa Conjunto de Biología Computacional, Barcelona Supercomputing Center (BSC), Institut de Recerca Biomèdica (IRB), Spanish National Bioinformatics Institute, Universitat de Barcelona, Barcelona, Spain.

<sup>10</sup>European Molecular Biology Laboratory (EMBL), Heidelberg, Germany.

<sup>11</sup>Hematology and Cell Therapy Department, Clínica Universidad de Navarra, Universidad de Navarra, Avenida Pío XII, 36 31008 Pamplona, Spain.

<sup>12</sup>Departamento de Bioquímica y Biología Molecular, Instituto Universitario de Oncología (IUOPA), Universidad de Oviedo, Oviedo, Spain.

<sup>13</sup>Division of Hematology, Department of Internal Medicine, The Ohio State University, Columbus, OH

<sup>14</sup>Department of Medical Oncology and Hematology, University Hospital Zürich and University of Zürich, Zürich, Switzerland

<sup>15</sup>Departament de Fonaments Clínics, Facultat de Medicina, Universitat de Barcelona, Barcelona, Spain

<sup>16</sup>Institució Catalana de Recerca i Estudis Avançats (ICREA), Barcelona, Spain.

\*Correspondence: [maduran@clinic.cat](mailto:maduran@clinic.cat), [imartins@clinic.cat](mailto:imartins@clinic.cat)

43 **Abstract**

44 We report a systematic analysis of the biological and clinical implications of DNA  
45 methylation variability in five categories of B-cell tumors derived from B cells spanning  
46 the entire maturation spectrum. We used 2056 primary samples including training and  
47 validation series and show that 88% of the human DNA methylome is dynamically  
48 modulated under normal and neoplastic conditions. B-cell tumors display both  
49 epigenetic imprints of their cellular origin and *de novo*, disease-specific epigenetic  
50 alterations that in part are related to differential transcription factor binding. These  
51 differential methylation patterns were used by a machine-learning approach to create  
52 a diagnostic algorithm that accurately classifies 14 B-cell tumor entities and subtypes  
53 with different clinical management. Beyond this, we identified extensive patient-  
54 specific epigenetic variability targeting constitutively silenced chromatin regions, a  
55 phenomenon we could relate to the proliferative history of normal and neoplastic B  
56 cells. We observed that, depending on the maturation stage of the tumor cell of origin,  
57 mitotic activity leaves different imprints into the DNA methylome. Subsequently, we  
58 constructed a novel DNA methylation-based mitotic clock called epiCMIT  
59 (epigenetically-determined Cumulative MIToses), whose lapse magnitude represents a  
60 strong independent prognostic variable within specific B-cell tumor subtypes and is  
61 associated with particular driver genetic alterations. Our findings reveal DNA  
62 methylation as a holistic tracker of B-cell tumor developmental history, with  
63 implications in the differential diagnosis and prediction of the outcome of the patients.

64

65

66

## 67 **Introduction**

68 The process of neoplastic transformation implies a dramatic alteration of cellular  
69 identity <sup>1</sup>. However, cancer cells partially maintain molecular imprints of the cellular  
70 lineage and maturation stage from which they originate <sup>2</sup>. B-cell neoplasms are a  
71 paradigmatic model of this phenomenon, as the maturation stage of different B-cell  
72 neoplasms is the main principle behind the World Health Organization classification of  
73 these tumors <sup>3</sup>. Recent studies have focused on the analysis of the DNA methylome, a  
74 *bona fide* epigenetic mark related to cellular identity and gene regulation <sup>4,5</sup>, during  
75 the entire B-cell maturation program <sup>6</sup> and in various B-cell neoplasms spanning the  
76 entire maturation spectrum. These include B-cell acute lymphoblastic leukemia (ALL)  
77 <sup>7,8</sup> derived from precursor B cells, mantle cell lymphoma (MCL) <sup>9</sup> and chronic  
78 lymphocytic leukemia <sup>10,11</sup>(CLL) derived from pre- and post-germinal center mature B  
79 cells, diffuse large B-cell lymphoma (DLBCL) <sup>12,13</sup> derived from germinal center B cells,  
80 and multiple myeloma (MM) <sup>14,15</sup> derived from terminally-differentiated plasma cells.  
81 These studies have revealed a dynamic DNA methylome during B-cell maturation as  
82 well as novel insights into the cellular origin, pathogenic mechanisms and clinical  
83 behavior of B-cell neoplasms reviewed in <sup>16</sup>. However, a global analysis of the entire  
84 normal cell differentiation program and derived neoplasms is neither available for B  
85 cells nor for any other human cell lineage. Thus, we herein exploit both previously  
86 generated DNA methylation datasets as well newly generated data to systematically  
87 decipher the sources of DNA methylation variability across B-cell neoplasms. This  
88 comprehensive approach using over 2000 samples reveals previously hidden biological  
89 insights and clinical associations. In particular, *de novo* disease-specific  
90 hypomethylation in active regulatory regions is associated with differential

91 transcription factor binding and targets genes important for disease-specific  
92 pathogenesis. From the clinical perspective, we define a set of epigenetic biomarkers  
93 that can accurately classify B-cell neoplasms requiring differential clinical management  
94 and construct a DNA methylation-based mitotic clock called epiCMIT as a personalized  
95 predictor of clinical behavior within each B-cell neoplasm.

96

## 97 **Results**

### 98 **Shared DNA methylation dynamics in normal and neoplastic B cells**

99 We analyzed previously published DNA methylation profiles of samples from normal  
100 and neoplastic B cells spanning the entire B-cell differentiation spectrum, all generated  
101 with the 450k microarray platform from Illumina. These included 10 normal B cell  
102 subpopulations<sup>6</sup> as well as the five common categories of B-cell neoplasms, i.e. ALL<sup>7,8</sup>,  
103 MCL<sup>9</sup>, CLL<sup>10,17</sup>, DLBCL (own unpublished series) and MM<sup>14</sup> (Fig. 1a and Supplementary  
104 Table 1). Following the guidelines of the TCGA Consortium, we selected samples  
105 containing a tumor-cell content more than 60% [https://www.cancer.gov/about-](https://www.cancer.gov/about-nci/organization/ccg/blog/2018/bcr-tips)  
106 [nci/organization/ccg/blog/2018/bcr-tips](https://www.cancer.gov/about-nci/organization/ccg/blog/2018/bcr-tips). This proportion of tumor cells was estimated  
107 by flow cytometry<sup>6,9,10,14,17</sup>, genetic data<sup>18</sup> and/or lineage-specific DNA methylation  
108 patterns (Supplementary Table 2). To validate that 60% was an appropriate threshold  
109 for B-cell tumors, we analyzed 5 MCLs and 3 CLLs in which we had DNA extracted both  
110 from sorted (minimum purity of 86%) and unsorted tumor cells (purity between 48%  
111 and 77%). Unsupervised analyses showed that samples tightly clustered according to  
112 patient number and not based on their tumor cell content (Extended Data Fig. 1a). In  
113 fact, tumor cell content in these paired samples was reflected in a minor component  
114 accounting for only 2% of the total variability, and therefore was considered negligible



115 (data not shown). Tumor cell content estimated by any of the three methods was in  
116 general highly correlated (Extended Data Fig. 1b) and in most of the cases, we used  
117 DNA methylation data to estimate tumor purity. However, MM samples showed that  
118 DNA methylation-based estimation of tumor cell content was far lower than that  
119 estimated by flow cytometry (Extended Data Fig. 1c). This result is congruent with  
120 previous DNA methylation data indicating that MM losses the B cell identity <sup>14</sup>.  
121 Unexpectedly, some DLBCL samples also showed a similar effect (Extended Fig. 1c),  
122 and therefore in MM and DLBCL, tumor cell content was estimated by flow cytometry  
123 and genetic data, respectively. After all filtering criteria (Methods), we generated a  
124 curated data matrix containing 1595 high quality samples (Fig. 1a and Supplementary  
125 Table 1) with DNA methylation values for 437182 CpGs, which was used in all  
126 downstream analyses.

127         This large comprehensive dataset offered an exceptional opportunity to step-  
128 wise dissect the DNA methylation variability of normal and neoplastic B cells at  
129 different magnitude levels, including cancer-specific, tumor entity-specific, tumor  
130 subentity-specific and individual-specific variability (Fig. 1b). Before studying such DNA  
131 methylation dynamics, we identified that only 12% of the studied CpGs show stable  
132 DNA methylation levels in normal and neoplastic B cells (Fig. 1C and Supplementary  
133 Table 3). We characterized these CpGs based on genetic location, CpG content and  
134 chromatin states from primary samples from the Blueprint consortium <sup>19</sup>. We  
135 identified that stably methylated regions were located at gene-bodies of actively  
136 transcribed genes whereas stably unmethylated sites were prevalent in CpG islands of  
137 promoter regions showing active chromatin marks (Fig. 1d, e). Stably methylated and  
138 unmethylated CpGs mainly converged into the same genes (Fig. 1e and Extended Data

139 Fig. 1e), which are highly expressed in normal and neoplastic B cells (Fig. 1f) and are  
140 involved in cellular functions such as cell cycle, RNA processing and energy metabolism  
141 (Extended Data Fig. 1g). These results indicate, on the one hand, that the stable  
142 fraction of the DNA methylome affects genes involved in fundamental cellular  
143 functions showing an epigenetic signature of expressed genes (Extended Data Fig. 1g).  
144 On the other hand, they show that the great majority of the DNA methylome (88%) is  
145 labile during normal B cell differentiation and neoplastic transformation.

146 We next wondered whether all B-cell tumors, regardless the entity, share a  
147 unifying DNA methylation signature related to their neoplastic nature. As 25% of the  
148 DNA methylome is modulated during normal B cell differentiation <sup>6,11</sup>, we took the  
149 remaining stable 75% and compared the methylomes of normal and neoplastic B cells.  
150 This analysis did not identify any consistent *de novo* DNA methylation signature that is  
151 shared by all B-cell neoplasms under study. Instead, DNA methylation variability is  
152 related to differences among B-cell tumor entities and subtypes as well as patient-  
153 specific variability, as will be shown in the following sections.

154

155 **Disease-specific hypomethylation targeting regulatory regions is associated with**  
156 **specific transcription factor bindings and differential gene expression**

157 We next aimed at studying whether disease-specific DNA methylation patterns may  
158 unravel differential pathogenic mechanisms underlying each B-cell neoplasm. Overall,  
159 a principal component analysis (PCA) showed that different B-cell neoplasms form  
160 distinct clusters (Fig. 2a). A further analysis indicated that the first nine components  
161 contained information regarding specific B-cell neoplasms and allowed us to distil the  
162 main biological sources of DNA methylation variability (Extended Data Fig 2a). The first

163 component was related to B-cell development, separating neoplasms according to the  
164 maturation stage of their cellular origin, i.e. ALL together with pre-germinal center B  
165 cells and mature B cell neoplasms together with germinal center B cells, memory B  
166 cells and plasma cells. The remaining components showed tumor-specific patterns,  
167 such as PC3, PC7 and PC9 related to MM, DLBCL and MCL-specific variability,  
168 respectively. Next, in order to identify DNA methylation signatures specifically  
169 associated with malignant transformation, we focused our next analysis on the  
170 genome fraction with stable (i.e. B-cell independent) DNA methylation levels across B-  
171 cell differentiation <sup>6</sup> (Fig. 2b). We showed varying numbers of tumor-specific DNA  
172 methylation (tsDNAm) changes, ranging from 616 in CLL to 49279 in MM (Fig. 2b,  
173 Supplementary Tables 4 and 5). Remarkably, we observed that DNA methylation  
174 changes manifested differently in distinct neoplasms. Overall, hypermethylation was  
175 enriched at CpG islands and promoter related regions, whereas hypomethylation at  
176 low CpG content regions such as open sea, shore and shelves (Extended Data Fig. 2c).  
177 ALL and DLBCL showed more tumor-specific DNA hypermethylation (tsDNAm-hyper)  
178 whereas MCL, CLL and MM acquired more tumor-specific DNA hypomethylation  
179 (tsDNAm-hypo), being this skew towards hypomethylation remarkable in MM (Fig. 2b-  
180 c and Extended Data Fig. 2b). To shed light into the potential causes of this  
181 phenomenon, we analyzed the expression levels of DNA methyltransferases (DNMTs)  
182 during normal B-cell maturation <sup>6</sup>. We identified that DNMT1, which has been linked  
183 both to DNA methylation maintenance and DNA hypermethylation of CpG islands  
184 marked by polycomb <sup>20</sup>, shows the highest expression levels in precursor B cells and  
185 germinal center B cells, the respective cells of origin of the mostly hypermethylated  
186 ALL and DLBCL. Conversely, bone marrow plasma cells, the cell of origin of the mostly

187 hypomethylated MM, showed the lowest levels of DNMT1 expression (Extended Data  
188 Fig. 2d). Although the precise mechanisms remain to be elucidated, the level of  
189 expression of DNMTs of the respective cells of origin may influence how DNA  
190 methylation changes are manifested in distinct B-cell neoplasms.

191 Transcription factors (TFs) have been reported to affect DNA methylation levels  
192 of regulatory regions upon their binding to the DNA <sup>21,22</sup>. Therefore, we performed TFs  
193 binding site prediction analysis in active regulatory elements (i.e. marked by H3K27ac)  
194 containing tsDNAm-hypo CpG (Fig. 2d and Methods). Interestingly, the entities in  
195 which tsDNAm-hypo was predominantly located in H3K27ac regions (Fig. 2c) showed  
196 enrichments for binding sites of TFs expressed in each respective entity (Extended  
197 Data Fig. 2e and Supplementary Table 6) and with a previously reported implication in  
198 their pathogenesis, such as SPI1/SPIB and EBF1 in ALL, TCF/ZEB in MCL, and NFAT in  
199 CLL (Fig. 2d) <sup>23-25</sup>. In the case of DLBCL and MM, their associated tsDNAm-hypo CpGs  
200 were actually depleted of regulatory elements (Fig. 2c), suggesting that TF binding may  
201 not be a major factor leading to their tumor-specific DNA methylation signatures.  
202 However, focusing only on the underrepresented H3K27ac-containing tsDNAm-hypo  
203 CpGs, we could also detect significant relationships with TFs potentially involved in the  
204 respective diseases, such as FOX family in DLBCL <sup>26</sup>, and NRL (a member of the  
205 oncogenic MAF family), ISL1, TEAD, and YY1 in MM <sup>27-30</sup>.

206 Beyond the potential role of TFs in shaping tumor-specific DNA methylation  
207 signatures, we also investigated the downstream transcriptional consequences of  
208 tsDNAm-hypo signatures. An analysis of transcriptional profiles of cases from all five  
209 diseases revealed a total of 94 genes associated with tsDNAm-hypo genes expressed in  
210 a disease-specific manner (Fig. 2e). Although some of the identified genes have been

211 shown to be specifically expressed in a particular disease, such as *CTLA4* and *KSR2* in  
212 CLL <sup>31</sup>, this comprehensive analysis provides a rich resource of novel epigenetically-  
213 regulated candidate oncogenes for mechanistic studies in each B-cell neoplasm entity.

214

215 **Accurate classification of 14 clinico-biological subtypes of B cell neoplasms using**  
216 **epigenetic biomarkers**

217 The B-cell neoplasms shown in Fig. 1a represent broad categories which are further  
218 classified into subtypes with different clinico-biological features based on genetic,  
219 transcriptional or epigenetic features <sup>3</sup>. These include high-hyperdiploid (HeH),  
220 11q23/MLL, t(12;21), t(1;19), t(9;22) and dic(9;20) ALLs <sup>7</sup>; C1 (conventional; germinal  
221 center-inexperienced) and C2 (leukemic non-nodal; germinal center-experienced)  
222 MCLs <sup>9</sup>; naïve-like/low-programmed, intermediate/intermediate-programmed and  
223 memory-like/high-programmed CLLs <sup>10,11</sup>, and finally germinal center B cell (GCB) and  
224 activated B cell (ABC) DLBCLs <sup>32</sup>. In MM, a previous report did not show methylation  
225 differences among the distinct cytogenetic subtypes <sup>14</sup> and thus MM subgrouping was  
226 not included in our analyses. Here, we focused on the identification of epigenetic  
227 biomarkers that may allow a comprehensive diagnosis of B-cell tumors entities and  
228 subtypes. We devised a strategy to construct a classifier algorithm that yielded 56  
229 CpGs as the optimal number distributed along 5 predictors (Extended Data Fig. 3a-e  
230 and Supplementary Table 7, Methods) to accurately discriminate the main B-cell tumor  
231 entities as a first step (predictor 1), and subsequently B-cell tumor subtypes as a  
232 second step (predictors 2, 3, 4 or 5) (Fig. 3a and Methods). The accuracy of the five  
233 predictors was evaluated using nested 10-fold stratified cross-validation in the training  
234 series (n=1345) and with external validation series (n=711) (Fig. 3b). Overall, we

235 obtained very high accuracies in the predictions in both main B-cell tumor entities  
236 (mean sensitivities for training series = 0.97 and validation series =0.99) and B-cell  
237 tumor subtypes (mean sensitivities for training series = 0.9 and validation series =  
238 0.97). In some tumor subtypes, we obtained lower accuracy in the predictions mostly  
239 due to small sample sizes. The script to easily implement the classifier is provided as  
240 supplementary information (SI1). This epigenetic classifier may represent the basis for  
241 a simple and accurate diagnostic tool for main B-cell tumors and B-cell tumor subtypes  
242 with more complicated diagnosis such as subtypes of MCL or CLL.

243

244 **Patient-specific DNA methylation changes are associated with silent chromatin**  
245 **without an impact on gene expression**

246 After having characterized entity-based sources of DNA methylation variability, we  
247 next aimed at studying patient-specific changes within each tumor subtype (Fig. 1b,  
248 level 4). To that end, we computed the total number and the number of hyper- and  
249 hypomethylation changes in every single patient within each B-cell tumor subtype as  
250 compared to HPC (Fig. 4a). As each B-cell tumor entity is derived from a distinct  
251 cellular origin, this approach has the advantage of fixing a reference point for all B-cell  
252 tumors, and the changes observed can be subsequently dissected into those  
253 modulated in normal B-cell maturation and those taking place exclusively in the  
254 context of neoplastic transformation (i.e. B-cell independent changes). Overall, we  
255 found large differences in the numbers of DNA methylation changes per patient (Fig.  
256 4a and Supplementary Table 8). To analyze whether some B-cell neoplasms show an  
257 intrinsically more variable epigenome, we studied the degree of DNA methylation  
258 variability in each group, but no differences were observed (Extended Data Fig. 4a).

259 The total number of altered CpGs per case was classified into four categories,  
260 depending whether DNA methylation was gained or lost and whether it was  
261 modulated or not during normal B cell development <sup>6</sup> (Fig. 2b and Fig. 4a). Regardless  
262 of the cellular origin of each B-cell tumor entity, this analysis uncovered striking  
263 correlations between the degree of B-cell related and B-cell independent DNA  
264 methylation changes, a finding that was maintained when hypermethylation and  
265 hypomethylation were studied separately (Fig. 4b and Extended Data Fig. 4b). This  
266 association suggests that the overall DNA methylation burden of the tumor in each  
267 individual patient may be shaped by a similar underlying phenomenon, which is  
268 manifested in all four CpG categories. This statement is further supported by a  
269 thorough annotation of the CpGs sites. Patient-specific CpGs that undergo  
270 hypomethylation in the B-cell related and B-cell independent fractions are consistently  
271 located in low CpG-content (open sea) low-signal heterochromatin, and the associated  
272 genes are constitutively silent both in normal and neoplastic B cells (Fig. 4c-e and  
273 Extended Data Fig. 4c-f). In the case of patient-specific hypermethylation, CpGs in both  
274 fractions are located in promoter regions and CpG islands (CGIs) with H3K27me3-  
275 repressed and poised-promoter chromatin states, and affect genes that remain silent  
276 across normal differentiation and neoplastic transformation of B cells (Fig. 4f-h,  
277 Extended Data Fig. 4c, g-i ). These findings indicate that most DNA methylation  
278 changes in B-cell tumor patients occur in silent chromatin regions in the absence of  
279 concurrent phenotypic changes, suggesting that a mechanism independent from gene  
280 regulation may underlie their overall DNA methylation landscape.

281 Beyond the classical role of DNA methylation as gene regulator, an accumulated body  
282 of published evidence supports the concept that DNA methylation changes accumulate

283 during cell division (Fig. 4i) <sup>33–39</sup>. Studies in fibroblasts and hematopoietic stem cells  
284 have reported that DNA methylation loss in late-replication heterochromatic regions  
285 and DNA methylation gain of polycomb targets increase as cells proliferate without an  
286 apparent impact on gene expression <sup>33–35</sup>. Furthermore, DNA methylation loss in  
287 heterochromatic, late-replicating domains has been recently associated with mitotic  
288 cell division in cancer <sup>39</sup>. Additionally, early studies detected preferential methylation  
289 of CGI marked by H3K27me3 in cancer <sup>40–42</sup>, and DNA methylation changes in regions  
290 marked by H3K27me3 in embryonic stem cells have been recently related to mitotic  
291 cell division in cancer <sup>38</sup>.

292 In order to explore whether DNA methylation changes in silent regions reflect  
293 the proliferative history of primary human B cells, we used DNA methylation data of an  
294 *in vitro* differentiation model of primary NBCs into plasma cells (Fig. 4j) <sup>43</sup>. At days 4  
295 and 6, different B cells were separated based on their proliferation history measured  
296 by CFSE dilution. We evaluated the DNA methylation profile in repressed regions at  
297 these time points and we detected the presence of hypermethylation at repressed  
298 H3K27me3-containing regions and hypomethylation of low signal/H3K9me3-containing  
299 heterochromatic regions in cells that have proliferated (Fig. 4k). This finding was  
300 particularly marked at day 6, in which the gradual accumulation of DNA methylation  
301 changes in silent regions was directly associated with their proliferative history (from  
302 less divided P3 to highly divided P1). The genes associated to the measured CpGs did  
303 not show any change of expression levels regardless of their methylation status, and  
304 thus were unlikely to be related to the phenotype of the cells (Fig. 4l).

305 Collectively, all these data indicate that a great fraction of the patient-specific DNA  
306 methylation changes in B-cell tumors accumulate at H3K27me3 and low



307 signal/H3K9me3 regions during cell division without affecting gene expression levels, a  
308 finding that is consistent with an epigenetic mitotic clock.

309

310 **Development and validation of an epigenetic mitotic clock reflecting the proliferative**  
311 **history of normal and neoplastic B cells**

312 We performed a step-wise selection of CpGs whose methylation status would reflect  
313 the cell mitotic activity regardless of its normal or neoplastic nature (Methods). Using  
314 this strategy, we finally retained 184 CpGs in stable polycomb regions that tend to gain  
315 DNA methylation and 1,164 CpGs in constitutive heterochromatin that tend to lose  
316 DNA methylation during normal B-cell maturation and neoplastic transformation (Fig.  
317 5a, Supplementary Table 9 and SI2). We next constructed two scores, one for  
318 hypermethylation and one for hypomethylation, which we respectively named  
319 epiCMIT-hyper and epiCMIT-hypo, ranging from 0 to 1 depending on low or high  
320 proliferative histories, respectively (Methods). Remarkably, epiCMIT-hypo contained a  
321 significant proportion of solo-WCGW CpGs, which have been recently associated with  
322 human mitotic cell division (N=1e5 permutations,  $pval < 0.0001$ )<sup>39</sup>. As normal B cell  
323 differentiation entails cell division, we initially evaluated both scores in normal B cells  
324 and observed an expected but strikingly high correlation ( $R=0.96$ ,  $pval < 0.001$ ), with B-  
325 cell subpopulations distributed according to their maturation state (and thus according  
326 to their accumulated proliferative history during B-cell differentiation) (Fig. 5b, left  
327 panel). This finding suggests that mitotic cell division in normal B cells leaves both  
328 hyper- and hypomethylated imprints. This high correlation between the two scores  
329 was also observed for MCL, CLL and DLBCL (Fig. 5b) but not for ALL and MM. The  
330 epiCMIT-hyper was greater than the epiCMIT-hypo in ALL samples, and the opposite

331 scenario was observed in MM. As these two neoplasias originate from B cells at the  
332 two extremes of the maturation spectrum, our data suggests that the impact of cell  
333 division onto the DNA methylome may be different depending on the maturation state  
334 of the cellular origin. Upon neoplastic transformation, dividing precursor B cells do not  
335 seem to acquire broad hypomethylation in heterochromatin but rather  
336 hypermethylation in polycomb-repressed regions. In contrast, neoplastic plasma cells  
337 acquire widespread hypomethylation in heterochromatin and virtually lack  
338 hypermethylation of polycomb-repressed regions. As previously shown in Extended  
339 Data Fig. 2d, this phenomenon may be related to the differential expression of DNMTs  
340 of the respective cells of origin of ALL and MM. We then took into consideration both  
341 scores to derive a unique epiCMIT score (Fig. 5c). The epiCMIT reflects the relative  
342 accumulation of mitotic cell divisions of a particular sample and is able to capture  
343 different tendencies in gaining or losing DNA methylation during mitotic cell division,  
344 as it respectively happens in ALL and MM patients (Fig. 5b). Finally, epiCMIT cannot be  
345 affected by different distribution of cell cycle phases in tumor samples, since the DNA  
346 methylome remains rather stable during the whole cell cycle <sup>44</sup>.

347       The applicability of the epiCMIT as mitotic clock was validated through several  
348 perspectives. First, we compared it with two previously reported hypermethylation-  
349 based mitotic clocks called epiTOC and MiAge <sup>38,45</sup> (Supplementary Table 8). The  
350 epiCMIT showed excellent correlations with these clocks in B-cell neoplasms that tend  
351 to acquire polycomb-related hypermethylation (e.g. mostly ALL, but also DLBCL and  
352 MCL); a moderate correlation in the case of CLL, which acquires more hypo- than  
353 hypermethylation (Fig. 4a and Extended Data Fig. 4b), and a total lack of correlation in  
354 the case of MM, which mostly loses DNA methylation (Fig. 5d and Extended Data Fig.

355 5a). Identical observations were obtained comparing the epiCMIT and the widely-  
356 reported CpG island methylator phenotype (CIMP) in human cancer <sup>46</sup> calculated as  
357 previously proposed <sup>47</sup> (Supplementary Table 8). Therefore, our analysis also reveals  
358 that the classical CIMP score in reality may represent a measure of the mitotic history  
359 of the cells. A potentially confusing aspect related to epiCMIT is the fact that DNA  
360 methylation has mainly been used to measure the chronological age of an individual  
361 <sup>48,49</sup>. In order to study the relationship between mitotic and aging DNA methylation  
362 clocks, we first compared the epiCMIT in naïve B cells from infant, adults and elderly  
363 donors and showed that epiCMIT was stable in all age ranges regardless of donor's age  
364 (Extended Data Fig. 5b). We next applied the most popular chronological age clock  
365 proposed by Horvath <sup>50</sup> and showed that the age of donors was predicted with high  
366 accuracy. This result indicates that, although both Horvath and epiCMIT scores are  
367 based on DNA methylation, they measure distinct biological phenomena (Extended  
368 Data Fig. 5b). Furthermore, the epiCMIT was highly variable in pediatric ALL samples  
369 with a minimum age range (Extended Data Fig. 5c). Collectively, these analyses  
370 indicate that the epiCMIT is a more universal mitotic clock than hypermethylation-  
371 based clocks since it captures the proliferative history of neoplasms regardless of their  
372 tendency of gaining or losing DNA methylation during mitotic cell division.

373         Second, the epiCMIT was validated using the *in vitro* B-cell differentiation  
374 model shown in Fig. 4j, in which we observed that epiCMIT increases with the  
375 proliferative history of the cells without altering gene expression levels of the epiCMIT-  
376 associated genes (Fig. 5e). Third, using WGS data from 138 CLL patients from our  
377 cohort <sup>10,17,51,52</sup>, we observed that the epiCMIT was highly correlated with the total  
378 number of somatic mutations (Extended Data Fig. 5d). We next extracted mutational

379 signatures as recently described<sup>53</sup> (Extended Data Fig. 5e) and observed significant  
380 correlations with mutational signatures SBS1 and SBS5 (Fig. 5f), that have been  
381 recently described as mitotic-like mutational processes<sup>54</sup>. We also identified a  
382 significant link between the epiCMIT and the non-canonical AID signature (SBS9) (Fig.  
383 5f)<sup>52,55</sup> in IGHV mutated CLL, possibly reflecting rounds of cell divisions in germinal  
384 center B cells before differentiation into memory B cells and malignant transformation.  
385 Fourth, although the epiCMIT reflects the proliferative history of the cell rather than  
386 the actual proliferative status of the samples (e.g. bmPC have high epiCMIT and do not  
387 proliferate, Fig. 5c), a relationship between epiCMIT and cell proliferation is expected  
388 (more proliferative history implies overall more proliferation, although also depends  
389 on time). Accordingly, MCL cases showing higher Ki-67 (a proliferation marker) also  
390 had higher epiCMIT than cases with moderate Ki-67 expression (Extended Data Fig 5f).  
391 Furthermore, GSEA analyses in ALL and CLL cases with high and low epiCMIT revealed  
392 that cases with high epiCMIT showed higher expression of genes related with cell  
393 proliferation (Extended Data Fig. 5g, h). Thus, these data suggest that cases with higher  
394 proliferative history also seem to have higher proliferation at the time of sampling.  
395 Collectively, the four lines of evidence presented above support that the epiCMIT may  
396 represent a *bona fide* measure of the relative number of cumulative mitotic cell  
397 divisions that normal and neoplastic B cells have undergone since the uncommitted  
398 hematopoietic cell stage.

399

400

401

402 **The epiCMIT is a strong independent variable predicting clinical behavior in B-cell**  
403 **tumors**

404 In normal B-cell maturation, the epiCMIT gradually augments as B cells proliferate  
405 during cell differentiation, an increase that is particularly marked in proliferative GC B  
406 cells (Fig. 5c). In neoplastic B cells, however, the interpretation of the epiCMIT is less  
407 trivial and must be divided into two components: the epiCMIT of the cell of origin and  
408 the epiCMIT acquired in the course of the neoplastic transformation and progression  
409 (Extended Data Fig. 6a). Therefore, the relative epiCMIT must be compared among  
410 patients from entities arising from the same B-cell maturation stage and should be a  
411 dynamic variable during cancer progression. Thus, we compared the epiCMIT in two  
412 paradigmatic transitions between precursor conditions and overt cancer, i.e.  
413 monoclonal gammopathy of undetermined significance (MGUS) and MM, as well as  
414 monoclonal B cell lymphocytosis (MBL) and CLL categorized according to their cellular  
415 origin. This analysis showed an overall lower epiCMIT in precursor lesions compared  
416 with overt cancer (Fig. 6a, upper panels), as would be expected due to their increased  
417 leukemia-specific proliferative history. In line with this finding, the epiCMIT increased  
418 in paired CLLs at diagnosis and progression before treatment as well as in sequential  
419 ALL samples at diagnosis, first relapse and second relapse (Fig. 6a, lower panels). These  
420 results suggest that the epiCMIT evolves together with clinical progression.

421 Based on our previous observations, we next wondered whether the epiCMIT  
422 could be useful to predict the clinical behavior of B-cell neoplasms. We analyzed the  
423 relationship of the epiCMIT with clinical outcome in specific B-cell tumor subtypes  
424 based on their shared cytogenetics (i.e. ALL) or cell of origin (i.e. MCL, CLL and DLBCL),  
425 and thus having a similar ground state B-cell specific proliferative history (Extended

426 Data Fig. 6a). In ALL, high epiCMIT was consistently associated with longer relapse-free  
427 and overall survival (Fig. 6b and Extended Data Fig. 6b) of the patients within each  
428 cytogenetic subtype, and thus better clinical outcome. Next, we additionally showed  
429 epiCMIT as significant variable in a multivariate regression Cox model with epiCMIT as  
430 continuous variable together with cytogenetic subtypes (Fig. 6b). This observation is in  
431 line with published evidence showing that a higher CIMP, which is highly correlated  
432 with the epiCMIT in ALL (Fig. 5d), is a good prognosis factor in this disease <sup>56,57</sup>. In  
433 contrast to ALL, the opposite clinical scenario was observed in mature B-cell  
434 neoplasms. In each of the CLL subtypes, a high epiCMIT was strongly associated with a  
435 worse prognosis using time to treatment (TTT) as end-point variable, both from  
436 sampling time (Fig. 6c, left panel) and in cases whose sample was obtained close to  
437 diagnosis (Extended Data Fig. 6c, left panel). Additionally, a multivariate Cox regression  
438 model for TTT revealed that epiCMIT as continuous variable was a highly significant  
439 variable conferring dismal prognosis together with age, number of driver genetic  
440 alterations <sup>17,58</sup> and epigenetic subgroups <sup>10,11,59</sup> (Fig. 6c right panel and Extended Data  
441 Fig. 6c). The epiCMIT maintained its independent prognostic value using overall  
442 survival as end-point variable, although its effect was moderate (Extended Data Fig.  
443 6d). These findings were widely confirmed in an additional series of 136 CLLs treated  
444 with chemo-immunotherapy (Fig. 6d and Extended Data Fig. 6c, d right panels). In the  
445 case of MCL, the epiCMIT showed an independent poor prognostic impact in the two  
446 cell-of-origin subtypes (C1 and C2), an observation that was confirmed in an extended  
447 series in the more aggressive and prevalent C1 group (Fig. 6e, f). Lastly, although the  
448 sample size was limited and requires further studies, our data suggest that high  
449 epiCMIT could also represent a poor prognostic variable within the two cell-of-origin

450 DLBCL subtypes (Extended Data Fig. 6e). Overall, these results suggest that an  
451 increased proliferative history of the neoplastic clone in precursor B-cell neoplasms at  
452 diagnosis predicts for a better disease-free survival, as previously published in studies  
453 analyzing the CIMP score<sup>56,57</sup>. In sharp contrast, in mature B-cell neoplasms, which are  
454 overall less proliferative than ALL, neoplastic clones with high proliferation history  
455 seem to predict for future proliferative capacity and consistently show worse clinical  
456 outcomes.

457

#### 458 **epiCMIT is associated with specific genetic driver alterations in CLL**

459 We next sought to assess which CLL driver alterations may confer a proliferative  
460 advantage to neoplastic cells, and subsequently a higher epiCMIT. To that end, we  
461 exploited 477 CLL samples in which we had DNA methylation data and whole exome  
462 sequencing (WES) (Fig. 7a). We initially depicted all driver genetic changes in each CLL  
463 subtype divided in high and low epiCMIT (Extended Data Fig. 7a). Next, we  
464 interrogated the levels of epiCMIT in patients with each driver genetic alteration (with  
465 at least 4 mutated patients). We performed the analyses in all CLL patients (showed as  
466 Global in Fig. 7b) and then within each epigenetic subgroup separately (Fig. 7b,  
467 Extended Data Fig. 7b and Methods). We showed significant and positive associations  
468 of epiCMIT with 24 genetic driver alterations affecting the main signaling pathways  
469 altered in CLL (Fig. 7b,c)<sup>17,58</sup>. The majority of these genetic alterations have been  
470 previously linked to an adverse clinical behavior of patients, such as *NOTCH1*, *TP53*,  
471 *SF3B1*, *ATM*, *BIRC3* or *EGR2*. Interestingly, epiCMIT showed a clear association with a  
472 new and recently identified non-coding genetic driver in CLL, the U1 spliceosomal RNA,  
473 a finding that may help in explaining its suggested poor prognostic impact<sup>60</sup>.

474 Remarkably, the presence of some genetic alterations was associated with high  
475 epiCMIT indistinctly in all patients, such as *TP53*, while others were particularly  
476 associated with epiCMIT within CLL subgroups, such as *NOTCH1* in n-CLL and i-CLL,  
477 *SF3B1* in i-CLL, and del(13q) and tri12 in m-CLL.

478 Collectively, these results suggest that the well-established clinical impact of genetic  
479 alterations in CLL may be explained by their association with a high proliferative  
480 potential, being this association different for certain genetic alterations depending on  
481 the maturation state of the cellular origin.

482

#### 483 **Discussion**

484 In this study, we have followed a systematic approach to dissect the sources of DNA  
485 methylation variability of B-cell neoplasms in the context of the normal B-cell  
486 differentiation program. Overall, we found that the methylation levels of 88% of all  
487 CpGs are modulated in normal and/or neoplastic B cells, suggesting that the human  
488 DNA methylome is even more dynamic than previously appreciated<sup>6,61,62</sup>. The  
489 extensive DNA methylation variability among different B-cell neoplasms is in part  
490 related to imprints of normal B-cell development. This phenomenon has been  
491 previously observed and has led to a more accurate classification not only of B-cell  
492 neoplasms<sup>9–11,59</sup>, but also of solid tumors<sup>2,63,64</sup>. In addition to this epigenetic link to  
493 normal cell maturation, each B-cell neoplasm also shows disease-specific hyper- and  
494 hypomethylation. Of particular interest are the disease-specific *de novo*  
495 hypomethylation signatures in active regulatory regions, which were associated with  
496 binding of TFs involved in the pathogenesis of each respective B-cell tumor. This  
497 phenomenon was particularly marked in ALL, MCL and CLL, whose *de novo*



498 hypomethylation was enriched in regulatory elements <sup>23–25</sup>. Unexpectedly, although  
499 DLBCL and MM pathogenesis has been linked to TFs, *de novo* hypomethylation was  
500 depleted in regulatory elements containing TF binding sites. In these two malignancies,  
501 we detected few binding sites of TFs with potential involvement in the diseases.  
502 However, we did not detect classical TFs such as BCL6 in DLBCL or IRF4 in MM, possibly  
503 because they are key players during B-cell differentiation and their binding sites may  
504 already be hypomethylated in the normal B-cell counterparts of DLBCL and MM.

505         In spite of the importance of DNA methylation in regulatory regions, we  
506 identified that the majority of DNA methylation changes in B-cell neoplasms, and  
507 especially those related to inter-patient variability within each B-cell tumor subtype,  
508 are located in inactive chromatin. The magnitude of this inter-patient variability  
509 affecting normal B-cell related and -independent regions is highly correlated,  
510 suggesting that the cause of these DNA methylation changes is a phenomenon that  
511 takes place both in normal and neoplastic B cells. Compelling published evidence as  
512 well as new data presented in our study support the notion that mitotic cell division  
513 leaves transcriptionally-inert epigenetic imprints onto the DNA. These take place in the  
514 form of hypomethylation of heterochromatin and hypermethylation of polycomb-  
515 repressed regions. This knowledge has recently led to the concept of using DNA  
516 methylation as a mitotic clock <sup>38,45</sup>, and has been recently used by single cell DNA  
517 methylation data to track the evolutionary trajectory of CLL <sup>65</sup>. Notably, methylation-  
518 based mitotic clocks seem to capture different biological information from aging clocks  
519 (Extended Data Fig. 5b) <sup>48</sup>. As far as we are aware, there are two published mitotic  
520 clocks <sup>38,45</sup> and both are hypermethylation-based. Furthermore, our analyses suggest  
521 that the classical CIMP phenomenon in cancer <sup>46</sup> may indeed represent another

522 hypermethylation-based mitotic clock. However, only using hypermethylation to  
523 determine the mitotic clock is insufficient to capture the mitotic activity of the cells, as  
524 some neoplasms may not acquire hypermethylation upon cell division but rather  
525 hypomethylation. For instance, neoplastic plasma cells in MM do not tend to acquire  
526 polycomb-related hypermethylation. Thus, using hypermethylation to determine the  
527 mitotic history of MM cells would incongruently lead to the conclusion that they have  
528 not proliferated beyond their cellular origin (Fig. 5d and Extended Data Fig. 5a).  
529 Therefore, to circumvent possible misleading interpretations, we generated a more  
530 broadly applicable mitotic clock (called epiCMIT) that takes into consideration both  
531 hyper- and hypomethylation. Importantly, epiCMIT aims at capturing the entire mitotic  
532 history of cells, including cell division associated both with normal development as well  
533 as neoplastic transformation and progression (Extended Data Fig. 6a). Thus, the  
534 epiCMIT must not be compared among tumors arising from different normal  
535 counterparts but its relative magnitude must be studied in those arising from a  
536 particular maturation stage. Within each of these subgroups, the relative epiCMIT has  
537 a profound independent prognostic value from other well-established clinical  
538 variables. Increased epiCMIT is associated with worse clinical outcome within CLL and  
539 MCL subgroups, thus indicating that superior proliferative history before treatment  
540 seems to determine future proliferative capacity and is thus associated with worse  
541 clinical outcome. Strikingly, we consistently found the opposite pattern in precursor  
542 ALL subgroups, a finding in line with recent reports showing that the presence of CIMP  
543 (a hypermethylation-based mitotic clock) is associated with better clinical outcome  
544 <sup>56,57</sup>. These results suggest that children having more proliferative ALL cells at diagnosis

545 (and thus a larger proliferative history) are more prone to be cured with high intensive  
546 chemotherapy regimens,<sup>66</sup> which cannot be administrated in elderly patients.

547 Finally, in order to identify the genetic lesions associated with higher  
548 proliferative history in CLL, we exploited our thorough genetic characterization of our  
549 cases to study the relationship between driver genetic alterations and epiCMIT. We  
550 identified 24 driver genetic alterations that may confer a higher proliferative capacity  
551 and thus are associated with higher epiCMIT or methylation evolution<sup>67</sup>. These genetic  
552 alterations were distributed throughout the main altered signaling pathways in CLL  
553 and were manifested differently in distinct CLL subgroups based on their cellular origin  
554 (Fig. 7b, c). This finding suggests that specific mutations may predispose to a higher  
555 proliferative advantage depending on the maturation stage and (epi)genetic makeup  
556 of the cellular origin.

557 In summary, our comprehensive epigenetic evaluation of normal and neoplastic  
558 B cells at different maturation stages uncovers multiple new insights into the biological  
559 roles of DNA methylation in cancer, an analytic approach that may also benefit our  
560 understanding of other cancers. From a clinical perspective, DNA methylation may  
561 provide a holistic diagnostic and prognostic approach to B-cell neoplasms. Particularly,  
562 we defined an accurate and easy-to-implement pan-B-cell tumor diagnostic tool and  
563 generated a mitotic clock reflecting the proliferative history of the neoplastic cells of  
564 each patient to estimate their clinical risk, which shall represent a valuable asset in the  
565 precision medicine era.

566

567 **ACKNOWLEDGEMENTS**

568 This research was funded by the European Union's Seventh Framework Programme  
569 through the Blueprint Consortium (grant agreement 282510), Generalitat de Catalunya  
570 Suport Grups de Recerca AGAUR 2017-SGR-1142 (to E.C.) and 2017-SGR-736 (to J.I.M.-  
571 S.), Ministerio de Ciencia, Innovación y Universidades of the Spanish Government  
572 (MCIU), Grants RTI2018-094274-B-I00 (to E.C.) and SAF2017-86126-R (to J.I.M.-S.) as  
573 well as Proyecto Medicina Personalizada PERMED (Grant PMP15/00007), which is part  
574 of Plan Nacional de I+D+I and is co-financed by the ISCIII-Sub-Directorate General for  
575 Evaluation and the European Regional Development Fund (FEDER-"Una manera de  
576 Hacer Europa"), CIBERONC (CB16/12/00225, CB16/12/00334, CB16/12/00236, and  
577 CB16/12/00489), the Accelerator award CRUK/AIRC/AECC joint funder-partnership,  
578 research funding from Fondo de Investigaciones Sanitarias, Instituto de Salud Carlos III  
579 PI17/01061 (SB), Ministerio de Ciencia, Innovación y Universidades (MCIU), RTI2018-  
580 094274-B-I00, SAF2015-64885-R (EC), the NIH grant number 1 P01CA229100 (EC), and  
581 the European Regional Development Fund "Una manera de fer Europa", CERCA  
582 Programme/Generalitat de Catalunya. FN is supported by a pre-doctoral fellowship of  
583 the Ministerio de Economía y Competitividad (MINECO, BES-2016-076372). E.C. is an  
584 Academia Researcher of the "Institució Catalana de Recerca i Estudis Avançats" (ICREA)  
585 of the Generalitat de Catalunya. This work was partially developed at the Centro Esther  
586 Koplowitz (CEK, Barcelona, Spain). We thank Francesco Maura for his help with the  
587 analysis of mutational signatures.

588

589

590

591 **AUTHOR CONTRIBUTIONS**

592 Investigator contributions were as follows: T.B., J.N., Y.N-Z., G.L., A.R-D., S.M., R.O.,  
593 G.C., M.K., A.C-Q., L.S-T., J.W., J.L., E.G., S.B., P.J., X.A., F.P., C.L-O., X.S.P., C.C.O., T.Z.,  
594 J.D., A.L-G. and E.C. contributed to sample biological and/or clinical annotation; M.D-  
595 F., G.C., F.N. and R.B. performed methylome, ChIP-Seq, transcriptome, genetic and/or  
596 statistical analyses; R.R., M.P. and D.T. provided computational support. M.D-F. and  
597 J.I.M.-S. participated in the study design. M.D-F., F.N., R.B., T.B., J.D., A.L-G., E.C. and  
598 J.I.M.-S. participated in data interpretation. J.I.M.-S. directed the research and wrote  
599 the manuscript together with M.D-F.

600

601 **COMPETING INTERESTS**

602 The authors declare no competing interests.

603

604

605

606

607

608 **References**

- 609 1. Roy, N. & Hebrok, M. Regulation of Cellular Identity in Cancer. *Dev. Cell* **35**, 674–  
610 84 (2015).
- 611 2. Hoadley, K. A. *et al.* Cell-of-Origin Patterns Dominate the Molecular  
612 Classification of 10,000 Tumors from 33 Types of Cancer. *Cell* **173**, 291-304.e6  
613 (2018).
- 614 3. Swerdlow SH, Campo E, Harris NL, Jaffe ES, Pileri SA, Stein H, T. J. *WHO*  
615 *Classification of Tumours of Haematopoietic and Lymphoid Tissues*.  
616 (International Agency for Research on Cancer (IARC), 2017).
- 617 4. Bird, A. DNA methylation patterns and epigenetic memory. *Genes Dev.* **16**, 6–21  
618 (2002).
- 619 5. Luo, C., Hajkova, P. & Ecker, J. R. Dynamic DNA methylation: In the right place at  
620 the right time. *Science* **361**, 1336–1340 (2018).
- 621 6. Kulis, M. *et al.* Whole-genome fingerprint of the DNA methylome during human  
622 B cell differentiation. *Nat. Genet.* **47**, 746–756 (2015).
- 623 7. Nordlund, J. *et al.* Genome-wide signatures of differential DNA methylation in  
624 pediatric acute lymphoblastic leukemia. *Genome biology* **14**, (2013).
- 625 8. Lee, S.-T. *et al.* Epigenetic remodeling in B-cell acute lymphoblastic leukemia  
626 occurs in two tracks and employs embryonic stem cell-like signatures. *Nucleic*  
627 *Acids Res.* **43**, 2590–602 (2015).
- 628 9. Queirós, A. C. *et al.* Decoding the DNA Methylome of Mantle Cell Lymphoma in  
629 the Light of the Entire B Cell Lineage. *Cancer Cell* **30**, 806–821 (2016).
- 630 10. Kulis, M. *et al.* Epigenomic analysis detects widespread gene-body DNA  
631 hypomethylation in chronic lymphocytic leukemia. *Nat. Genet.* **44**, 1236–1242  
632 (2012).
- 633 11. Oakes, C. C. *et al.* DNA methylation dynamics during B cell maturation underlie a  
634 continuum of disease phenotypes in chronic lymphocytic leukemia. *Nat. Genet.*  
635 (2016). doi:10.1038/ng.3488
- 636 12. Kretzmer, H. *et al.* DNA methylome analysis in Burkitt and follicular lymphomas  
637 identifies differentially methylated regions linked to somatic mutation and  
638 transcriptional control. *Nat. Genet.* (2015). doi:10.1038/ng.3413
- 639 13. Shaknovich, R. *et al.* DNA methylation signatures define molecular subtypes of  
640 diffuse large B-cell lymphoma. *Blood* **116**, e81-9 (2010).
- 641 14. Agirre, X. *et al.* Whole-epigenome analysis in multiple myeloma reveals DNA  
642 hypermethylation of B cell-specific enhancers. *Genome Res.* **25**, 478–87 (2015).
- 643 15. Kaiser, M. F. *et al.* Global methylation analysis identifies prognostically  
644 important epigenetically inactivated tumor suppressor genes in multiple  
645 myeloma. *Blood* **122**, 219–226 (2013).
- 646 16. Oakes, C. C. & Martin-Subero, J. I. Insight into origins, mechanisms & utility

- 647 of DNA methylation in B cell malignancies. *Blood* **132**, blood-2018-02-692970  
648 (2018).
- 649 17. Puente, X. S. *et al.* Non-coding recurrent mutations in chronic lymphocytic  
650 leukaemia. *Nature* (2015). doi:10.1038/nature14666
- 651 18. Karube, K. *et al.* Integrating genomic alterations in diffuse large B-cell lymphoma  
652 identifies new relevant pathways and potential therapeutic targets. *Leukemia*  
653 675–684 (2017). doi:10.1038/leu.2017.251
- 654 19. Stunnenberg, H. G., International Human Epigenome Consortium & Hirst, M.  
655 The International Human Epigenome Consortium: A Blueprint for Scientific  
656 Collaboration and Discovery. *Cell* **167**, 1145–1149 (2016).
- 657 20. Viré, E. *et al.* The Polycomb group protein EZH2 directly controls DNA  
658 methylation. *Nature* **439**, 871–874 (2006).
- 659 21. Stadler, M. B. *et al.* Corrigendum: DNA-binding factors shape the mouse  
660 methylome at distal regulatory regions. *Nature* **484**, 550–550 (2012).
- 661 22. Burger, L., Gaidatzis, D., Schübeler, D. & Stadler, M. B. Identification of active  
662 regulatory regions from DNA methylation data. *Nucleic Acids Res.* **41**, (2013).
- 663 23. Somasundaram, R., Prasad, M. A. J., Ungerbäck, J. & Sigvardsson, M.  
664 Transcription factor networks in B-cell differentiation link development to acute  
665 lymphoid leukemia. *Blood* **126**, 144–152 (2015).
- 666 24. Sánchez-Tilló, E. *et al.* The EMT activator ZEB1 promotes tumor growth and  
667 determines differential response to chemotherapy in mantle cell lymphoma. *Cell*  
668 *Death Differ.* **21**, 247–257 (2014).
- 669 25. Wolf, C. *et al.* NFATC1 activation by DNA hypomethylation in chronic  
670 lymphocytic leukemia correlates with clinical staging and can be inhibited by  
671 ibrutinib. *Int. J. Cancer* **142**, 322–333 (2018).
- 672 26. Blonska, M. *et al.* Jun-regulated genes promote interaction of diffuse large B-cell  
673 lymphoma with the microenvironment. *Blood* **125**, 981–991 (2015).
- 674 27. Huerta-Yepez, S. *et al.* Overexpression of Yin Yang 1 in bone marrow-derived  
675 human multiple myeloma and its clinical significance. *Int. J. Oncol.* **45**, 1184–  
676 1192 (2014).
- 677 28. Sprynski, A. C. *et al.* Insulin is a potent myeloma cell growth factor through  
678 insulin/IGF-1 hybrid receptor activation. *Leukemia* **24**, 1940–1950 (2010).
- 679 29. Riz, I. & Hawley, R. G. Increased expression of the tight junction protein  
680 TJP1/ZO-1 is associated with upregulation of TAZ-TEAD activity and an adult  
681 tissue stem cell signature in carfilzomib-resistant multiple myeloma cells and  
682 high-risk multiple myeloma patients. *Oncoscience* **4**, 79–94 (2017).
- 683 30. Herath, N. I., Rocques, N., Garancher, A., Eychène, A. & Pouponnot, C. GSK3-  
684 mediated MAF phosphorylation in multiple myeloma as a potential therapeutic  
685 target. *Blood Cancer J.* **4**, e175–e175 (2014).
- 686 31. Navarro, A. *et al.* Improved classification of leukemic B-cell lymphoproliferative  
687 disorders using a transcriptional and genetic classifier. *Haematologica* **102**, 360–

- 688 363 (2017).
- 689 32. Alizadeh, A. A. *et al.* Distinct types of diffuse large B-cell lymphoma identified by  
690 gene expression profiling. *Nature* **403**, 503–511 (2000).
- 691 33. Aran, D., Toperoff, G., Rosenberg, M. & Hellman, A. Replication timing-related  
692 and gene body-specific methylation of active human genes. *Hum. Mol. Genet.*  
693 **20**, 670–680 (2011).
- 694 34. Beerman, I. *et al.* Proliferation-dependent alterations of the DNA methylation  
695 landscape underlie hematopoietic stem cell aging. *Cell Stem Cell* **12**, 413–25  
696 (2013).
- 697 35. Landan, G. *et al.* Epigenetic polymorphism and the stochastic formation of  
698 differentially methylated regions in normal and cancerous tissues. *Nat. Genet.*  
699 **44**, 1207–14 (2012).
- 700 36. Siegmund, K. D., Marjoram, P., Woo, Y.-J., Tavaré, S. & Shibata, D. Inferring  
701 clonal expansion and cancer stem cell dynamics from DNA methylation patterns  
702 in colorectal cancers. *Proc. Natl. Acad. Sci. U. S. A.* **106**, 4828–4833 (2009).
- 703 37. Spencer, D. H. *et al.* CpG Island Hypermethylation Mediated by DNMT3A Is a  
704 Consequence of AML Progression. *Cell* **168**, 801-816.e13 (2017).
- 705 38. Yang, Z. *et al.* Correlation of an epigenetic mitotic clock with cancer risk.  
706 *Genome Biol.* **17**, 205 (2016).
- 707 39. Zhou, W. *et al.* DNA methylation loss in late-replicating domains is linked to  
708 mitotic cell division. *Nat. Genet.* **50**, 591–602 (2018).
- 709 40. Schlesinger, Y. *et al.* Polycomb-mediated methylation on Lys27 of histone H3  
710 pre-marks genes for de novo methylation in cancer. *Nat. Genet.* **39**, 232–236  
711 (2007).
- 712 41. Ohm, J. E. *et al.* A stem cell-like chromatin pattern may predispose tumor  
713 suppressor genes to DNA hypermethylation and heritable silencing. *Nat. Genet.*  
714 **39**, 237–242 (2007).
- 715 42. Widschwendter, M. *et al.* Epigenetic stem cell signature in cancer. *Nat. Genet.*  
716 **39**, 157–158 (2007).
- 717 43. Caron, G. *et al.* Cell-Cycle-Dependent Reconfiguration of the DNA Methylome  
718 during Terminal Differentiation of Human B Cells into Plasma Cells. *Cell Rep.* **13**,  
719 1059–71 (2015).
- 720 44. Vandiver, A. R., Idrizi, A., Rizzardi, L., Feinberg, A. P. & Hansen, K. D. DNA  
721 methylation is stable during replication and cell cycle arrest. *Sci. Rep.* **5**, 1–8  
722 (2015).
- 723 45. Youn, A. & Wang, S. The MiAge Calculator: a DNA methylation-based mitotic age  
724 calculator of human tissue types. *Epigenetics* **13**, 192–206 (2018).
- 725 46. Issa, J. CpG island methylator phenotype in cancer. *Nat. Rev. Cancer* **4**, 988–93  
726 (2004).
- 727 47. Sánchez-Vega, F., Gotea, V., Margolin, G. & Elnitski, L. Pan-cancer stratification  
728 of solid human epithelial tumors and cancer cell lines reveals commonalities and



- 729 tissue-specific features of the CpG island methylator phenotype. *Epigenetics and*  
730 *Chromatin* **8**, 1–24 (2015).
- 731 48. Field, A. E. *et al.* DNA Methylation Clocks in Aging: Categories, Causes, and  
732 Consequences. *Mol. Cell* **71**, 882–895 (2018).
- 733 49. Horvath, S. & Raj, K. DNA methylation-based biomarkers and the epigenetic  
734 clock theory of ageing. *Nat. Rev. Genet.* (2018). doi:10.1038/s41576-018-0004-3
- 735 50. Horvath, S. DNA methylation age of human tissues and cell types. *Genome Biol*  
736 **14**, R115 (2013).
- 737 51. Ferreira, P. G. *et al.* Transcriptome characterization by RNA sequencing  
738 identifies a major molecular and clinical subdivision in chronic lymphocytic  
739 leukemia Gene Regulation Stem Cells and Cancer Programme, Centre for  
740 Genomic Regulation (CRG). 212–226 (2014). doi:10.1101/gr.152132.112
- 741 52. Puente, X. S. *et al.* Whole-genome sequencing identifies recurrent mutations in  
742 chronic lymphocytic leukaemia. *Nature* **475**, 101–105 (2011).
- 743 53. Maura, F. *et al.* A practical guide for mutational signature analysis in  
744 hematological malignancies. *Nat. Commun.* (2019). doi:10.1038/s41467-019-  
745 11037-8
- 746 54. Alexandrov, L. B. *et al.* Clock-like mutational processes in human somatic cells.  
747 *Nat. Genet.* **47**, 1402–7 (2015).
- 748 55. Alexandrov, L. *et al.* The Repertoire of Mutational Signatures in Human Cancer.  
749 *bioRxiv* (2018). doi:https://doi.org/10.1016/j.cell.2011.02.013
- 750 56. Borssén, M. *et al.* DNA methylation holds prognostic information in relapsed  
751 precursor B-cell acute lymphoblastic leukemia. *Clin. Epigenetics* **10**, 31 (2018).
- 752 57. Sandoval, J. *et al.* Genome-wide DNA methylation profiling predicts relapse in  
753 childhood B-cell acute lymphoblastic leukaemia. *Br. J. Haematol.* **160**, 406–9  
754 (2013).
- 755 58. Landau, D. A. *et al.* Mutations driving CLL and their evolution in progression and  
756 relapse. *Nature* **526**, 525–30 (2015).
- 757 59. Queirós, a C. *et al.* A B-cell epigenetic signature defines three biological  
758 subgroups of chronic lymphocytic leukemia with clinical impact. *Leukemia* 598–  
759 605 (2015). doi:10.1038/leu.2014.252
- 760 60. Shuai, S. *et al.* The U1 spliceosomal RNA is recurrently mutated in multiple  
761 cancers. *Nature* **574**, 712–716 (2019).
- 762 61. Ziller, M. J. *et al.* Charting a dynamic DNA methylation landscape of the human  
763 genome. *Nature* **500**, 477–81 (2013).
- 764 62. Lister, R. *et al.* Human DNA methylomes at base resolution show widespread  
765 epigenomic differences. *Nature* **462**, 315–322 (2009).
- 766 63. Rodríguez-Paredes, M. *et al.* Methylation profiling identifies two subclasses of  
767 squamous cell carcinoma related to distinct cells of origin. *Nat. Commun.* **9**,  
768 (2018).

- 769 64. Bormann, F. *et al.* Cell-of-Origin DNA Methylation Signatures Are Maintained  
770 during Colorectal Carcinogenesis. *Cell Rep.* **23**, 3407–3418 (2018).
- 771 65. Gaiti, F. *et al.* Epigenetic evolution and lineage histories of chronic lymphocytic  
772 leukaemia. *Nature* (2019). doi:10.1038/s41586-019-1198-z
- 773 66. Rhein, P. *et al.* Gene expression shift towards normal B cells, decreased  
774 proliferative capacity and distinct surface receptors characterize leukemic blasts  
775 persisting during induction therapy in childhood acute lymphoblastic leukemia.  
776 *Leukemia* **21**, 897–905 (2007).
- 777 67. Oakes, C. C. *et al.* Evolution of DNA Methylation Is Linked to Genetic Aberrations  
778 in Chronic Lymphocytic Leukemia. *Cancer Discov.* **4**, 348–361 (2014).
- 779
- 780

781

782 **Figure legends**

783 **Fig. 1: Shared DNA methylation dynamics in B-cell tumors.**

784 **a**, Number of normal and neoplastic B-cells included in the study with tumor cell  
785 content of at least 60% (additional samples for validations are used in Fig. 3 and Fig. 6,  
786 which are later detailed). HPC, hematopoietic precursor cells; pre-B, precursor B-cell  
787 and immature B cells; NBC, naïve B cells; GC, germinal center B cells; MBC, memory B  
788 cells; tPC, tonsillar plasma cells; bmPC, bone-marrow plasma cells; ALL, acute  
789 lymphoblastic leukemia; MCL, mantle cell lymphoma; CLL, chronic lymphocytic  
790 leukemia; DLBCL, Diffuse large B cell lymphoma; MM, multiple myeloma; BM, bone  
791 marrow; PB, peripheral blood; LN, lymph node.

792 **b**, Different levels of DNA methylation variability addressed in the study.

793 **c**, Heatmaps showing shared DNA hyper- (top) and hypomethylation (bottom) in B-cell  
794 tumors.

795 **d**, Chromatin state enrichments of regions sharing DNA hyper- and hypomethylation  
796 (all CpGs of 450k array were used as background). ActProm, Active promoter;  
797 WkProm, Weak promoter; StrEnh1, Strong enhancer 1 (promoter-related); StrEnh2,  
798 Strong enhancer 2; WkEnh, Weak enhancer; TxnTrans, Transcription transition;  
799 TxnElong, Transcription elongation; WkTxn, Weak transcription; PoisProm, Poised  
800 promoter; H3K27me3, Polycomb-repressed region; H3K9me3, H3K9me3  
801 heterochromatin; Het;LowSign, Het;LowSign heterochromatin.

802 **e**, Overlap of the target genes of stably methylated and unmethylated CpGs.

803 **f**, Gene expression percentile within each sample of genes showing stable hyper- and  
804 hypomethylation.

805

806 **Fig. 2: Disease-specific hypomethylation at H3K27ac regions is associated with**  
807 **specific transcription factor bindings and differential gene expression.**

808 **a**, Principal component analysis of normal and neoplastic B-cells, including ALL, MCL,  
809 CLL, DLBCL and MM. ALL, acute lymphoblastic leukemia; MCL, mantle cell lymphoma;  
810 CLL, chronic lymphocytic leukemia; DLBCL, Diffuse large B cell lymphoma; MM,  
811 multiple myeloma.

812 **b**, Number of *de novo* DNA methylation changes in each B-cell tumor entity.

813 **c**, Heatmap showing entity-specific hypomethylation and the number of CpGs falling at  
814 regulatory regions. Per each B-cell tumor, the same number of *de novo* CpGs was  
815 randomly chosen from the 450K array and interrogated the percentage falling at  
816 regulatory regions.

817 **d**, Transcription factor binding site predictions for *de novo* hypomethylated CpGs  
818 falling at regulatory regions in c, for each B-cell tumor.

819 **e**, Differential gene expression percentiles among B-cell tumors for genes showing  
820 specific-hypomethylation at regulatory regions.

821

822 **Fig. 3: Accurate classification of 14 clinico-biological subtypes of B cell neoplasms**  
823 **using epigenetic biomarkers.**

824 **a**, Heatmaps for the CpGs used for the pan B-cell cancer classifier. The classifier  
825 consists of two steps: in the first step (1) an unknown B-cell tumor can be predicted  
826 into ALL, MCL, CLL, DLBCL or MM, and subsequently (second step, using one of the  
827 predictors (2), (3), (4) or (5)) to any B-cell tumor subtype, namely HeH, 11q23/MLL,  
828 t(1;19), t(9;22), dic(9;20) for ALL, C1 and C2 for MCL, n-CLL, i-CLL and m-CLL for CLL,

829 and finally GCB or ABC for DLBCLs. ALL, acute lymphoblastic leukemia; MCL, mantle cell  
830 lymphoma; CLL, chronic lymphocytic leukemia; DLBCL, Diffuse large B cell lymphoma;  
831 MM, multiple myeloma.

832 **b**, Accuracy for the pan-B-cell cancer diagnostic classifier (formed by the 5 predictors in  
833 Fig. 3a) for training and validation series. Sensitivity is represented as black circles or  
834 triangles for training or validation series, respectively (sensitivity in the training series  
835 was evaluated using 10-fold stratified cross-validation). The total number of samples  
836 used for both training and validation is shown.

837

838 **Fig. 4: Patient-specific DNA methylation changes are associated with silent chromatin**  
839 **without an impact on gene expression.**

840 **a**, Circos plot representing the number of DNA methylation changes with respect to  
841 hematopoietic precursor cells (HPC) in individual patients for normal and neoplastic B  
842 cells (each bar represents one patient). Total number of DNA methylation changes,  
843 hypomethylation changes and hypermethylation changes are depicted at outer,  
844 middle and inner tracks, respectively. Changes are further classified and color-coded as  
845 B-cell related or B-cell independent if they occur or not during normal B-cell  
846 differentiation, respectively.

847 **b**, Number of B-cell related changes against B-cell independent changes in normal and  
848 neoplastic B-cells. Fitted regression lines are shown at bottom per each B-cell tumor  
849 subtype.

850 **c**, B-cell related CpGs losing DNA methylation in B-cell tumors and the percentages in  
851 each chromatin state in normal and neoplastic B-cells.

852 **d**, Example CpGs from **c** in normal and neoplastic B-cells.

853 **e**, Density of genes distributed along gene expression percentiles of genes associated  
854 with B-cell related CpGs losing DNA methylation in B-cell tumors in each B-cell tumor  
855 subtype. Expressed genes are displayed at right as control (with presence of  
856 H3K36me3). Means within each B-cell subpopulation as well as B-cell tumors are  
857 represented.

858 **f**, B-cell related CpGs gaining DNA methylation in B-cell tumors and the percentages in  
859 each chromatin state in normal and neoplastic B-cells.

860 **g**, Example CpGs from **f** in normal and neoplastic B-cells.

861 **h**, Density of genes distributed along gene expression percentiles of genes associated  
862 with B-cell related CpGs gaining DNA methylation in B-cell tumors in each B-cell tumor  
863 subtype. Expressed genes are displayed at right as control (with presence of  
864 H3K36me3). Means within each B-cell subpopulation as well as B-cell tumors are  
865 represented.

866 **i**, Model for DNA methylation changes occurring at repressed regions during mitotic  
867 cell division.

868 **j**, *In vitro* model for plasma blast differentiation from human primary naïve B cells.  
869 Primary naïve B cells are labeled with CFSE at day 0. DNA methylation profiles are  
870 obtained at day 0 (primary naïve B cells) day 4 (CFSE-high and CFSE-low) and day 6 (P1-  
871 CFSE-low and CD38+, P2-CFSE-intermediate, CD38-, P3-CFSE-high CD38-).

872 **k**, DNA methylation changes accumulate at repressed regions during mitotic cell  
873 division upon *in vitro* proliferation and differentiation of primary naïve B cells to  
874 plasma blasts. Hypermethylation takes place at H3K27me3 regions, whereas  
875 hypomethylation at heterochromatin and H3K9me3 regions. ChIP-seq data for primary

876 NBC and GC B cells was used. The mean of several biological replicates is represented  
877 (numbers are depicted at bottom of the heatmaps).

878 **I**, Density of genes distributed in gene expression percentiles for genes with changes in  
879 DNA methylation in (K).

880

881 **Fig. 5: Development and validation of an epigenetic mitotic clock reflecting the**  
882 **proliferative history of normal and neoplastic B cells.**

883 **a**, Selection of CpGs gaining DNA methylation at H3K27me3 and losing DNA  
884 methylation in normal and neoplastic B cells to construct the epiCMIT-hyper and  
885 epiCMIT-hypo scores. epiCMIT, epigenetically-determined Cumulative MIToses.

886 **b**, Correlation of epiCMIT-hyper and epiCMIT-hypo in normal and neoplastic B cells.

887 **c**, epiCMIT in normal and neoplastic B cells.

888 **d**, Correlation of epiCMIT with previously reported hypermethylation-based mitotic  
889 clocks, including epiTOC (epigenetic Timer for Cancer risk) and MiAge. Correlation with  
890 CIMP (CpG hypermethylator phenotype) is also shown, although it has not been  
891 formally presented as mitotic clock.

892 **e**, epiCMIT score during the *in vitro* B-cell differentiation as well as gene expression of  
893 genes containing epiCMIT-CpGs. Expressed genes are also shown as control (presence  
894 of H3K36me3).

895 **f**, Correlation of epiCMIT and mutational signatures related to proliferative history for  
896 138 CLL samples with available DNA methylation data and WGS. SBS1, SBS5 have been  
897 reported as clock-like mutational signatures. SBS9 is related to ncaID mutations.

898

899 **Fig. 6: The epiCMIT is a strong independent variable predicting clinical behavior in B-**  
900 **cell tumors.**

901 **a**, epiCMIT is a dynamic variable that reflects disease progression. Precursor conditions  
902 MGUS and MBL show significantly lower epiCMIT levels than their respective cancer  
903 conditions CLL and MM, respectively. epiCMIT increases from diagnosis to progression  
904 in paired CLL samples and in paired ALL at diagnosis, first relapse and second relapse.

905 **b**, Kaplan-Meier curves for three ALL cytogenetic groups shown as example divided in  
906 low and high epiCMIT using maxstat rank statistics. Multivariate cox regression model  
907 for relapse-free survival with epiCMIT against cytogenetic groups. Hazard ratio for  
908 epiCMIT correspond to 0.1 increments.

909 **c**, Kaplan-Meier curves for CLL epigenetic groups based on different cellular origin  
910 divided in low and high epiCMIT using maxstat rank statistics. Multivariate cox  
911 regression model for time to first treatment with epiCMIT against age, number of  
912 driver alterations and epigenetic groups based on different cellular origin. Validation  
913 series is shown in **d**. Hazard ratio for epiCMIT correspond to 0.1 increments.

914 **e**, Kaplan-Meier curves for MCL epigenetic groups based on different cellular origin  
915 divided in low and high epiCMIT using maxstat rank statistics. Multivariate cox  
916 regression model for overall survival with epiCMIT against epigenetic groups based on  
917 different cellular origin. Hazard ratio for epiCMIT correspond to 0.1 increments.

918 **f**, Validation series for C1 MCL. Hazard ratio for epiCMIT correspond to 0.1 increments.

919

920 **Fig. 7: epiCMIT is associated with specific genetic driver alterations in CLL**

921 **a**, Are there specific genetic alterations in CLL that may predispose a proliferative  
922 advantage to neoplastic cells?



923 **b**, Genetic driver alterations in CLL associated with higher epiCMIT grouped by  
924 signaling pathways reported. Analyses were done globally for all CLL samples (although  
925 adjusted by epigenetic groups) as well as within each epigenetic subgroup. Positive  
926 point estimates relate to positive associations with epiCMIT. 95% confidence intervals  
927 are shown with colors coding for FDR corrections. Number of patients with each  
928 genetic driver alteration is shown at right.

929 **c**, Oncoprint showing genetic driver alterations associated with higher epiCMIT in CLL  
930 epigenetic groups separately. Other clinicobiological features including MBL or CLL,  
931 IGHV status, Age, Binet stage, epiCMIT subgroups based on Fig. 5c, need for treatment  
932 and patient status are shown. Cases are ordered within each CLL subgroup from lower  
933 to higher epiCMIT values. Distinct genetic driver alterations are depicted with different  
934 colors and shapes. The percentage of mutated patients as well as barplots showing the  
935 number of mutated patients for each alteration is shown at right.

936

937

938

939

940 **Supplementary figure legends**

941

942 **Extended Data Fig.1**

943 **a**, Principal component analysis and hierarchical clustering of paired un/purified DNA  
944 methylation profiles obtained with EPIC array from MCL and CLL patients. Colors  
945 represent the same un/purified sample, with FACS-based purities highlighted in each  
946 sample. MCL, mantle cell lymphoma. CLL, chronic lymphocytic leukemia.

947 **b**, Correlations and Passing Bablock regression fits of gold-standard methods for tumor  
948 purity prediction (FACS and genetic-based) against DNA methylation-based tumor  
949 purity prediction for MCL and CLL patients.

950 **c**, Pearson correlations and Passing Bablock regression fits for gold-standard methods  
951 for tumor purity predictions (FACS and genetic-based) against DNA methylation-based  
952 tumor purity predictions for MM and DLBCL patients. MM, multiple myeloma. DLBCL,  
953 Diffuse large B cell lymphoma.

954 **d**, Pan-B cell DNA methylation signature used to deconvolute DNA methylation and  
955 obtain B-cell tumor purities in DLBCL and MM. Bar plots representing DNA-methylation  
956 based predictions as well as gold standard-based predictions are represented at top  
957 the heatmaps.

958 **e**, Genomic distribution of stably un/methylated CpGs in B-cell tumors.

959 **f**, Example gene showing stably un/methylated CpGs.

960 **g**, Gene ontology analysis of genes showing both stable un/methylated CpGs.

961

962

963 **Extended Data Fig.2**

964 **a**, Principal component analysis for normal and neoplastic B cells, including ALL, MCL,  
965 CLL, DLBCL and MM. Each component is resented separately (until the ninth  
966 component). ALL, acute lymphoblastic leukemia; MCL, mantle cell lymphoma; CLL,  
967 chronic lymphocytic leukemia; DLBCL, Diffuse large B cell lymphoma; MM, multiple  
968 myeloma.

969 **b**, Heatmap showing B-cell tumor-specific hypermethylation and the number of CpGs  
970 falling at regulatory regions. Per each B-cell tumor, the same number of *de novo* CpGs  
971 was randomly chosen from the 450K array and interrogated the percentage falling at  
972 regulatory regions.

973 **c**, Genomic distribution for *de novo* DNA methylation changes in B-cell tumors.

974 **d**, Gene expression of DNA methyltransferases *DNMT1*, *DNMT3A* and *DNMT3B*  
975 throughout B cell differentiation.

976 **e**, Gene expression percentile of TFs showing the most significant p-values and  
977 frequencies in *de novo* hypomethylation signatures in each B-cell tumor in Fig. 2d.

978

979 **Extended Data Fig. 3**

980 **a**, Sensitivity of the pan-B-cell diagnostic algorithm for the classification of an unknown  
981 B-cell tumor into ALL, MCL, CLL, DLBCL or MM while incrementing the number of CpGs  
982 used in the classifier algorithm (first step of Fig. 3A). The number of CpGs selected for  
983 the predictor is selected by maximizing the highest balanced accuracy and is indicated  
984 with a red circle. This strategy was applied also in the remaining 4 predictors to classify  
985 B-cell tumor subtypes in panels b,, c,, d, and e, (second step of Fig. 3A). Each B-cell  
986 tumor is represented with different shapes and colors. ALL, acute lymphoblastic

987 leukemia; MCL, mantle cell lymphoma; CLL, chronic lymphocytic leukemia; DLBCL,  
988 Diffuse large B cell lymphoma; MM, multiple myeloma

989 **b**, Sensitivity of predictor 2 for the pan-B-cell diagnostic algorithm (predictor 2 of Fig.  
990 3a) for the classification of ALL into the subtypes HeH, 11q23/MLL, t(12;21), t(1;19),  
991 t(9;22) and dic(9;20) while incrementing the number of CpGs.

992 **c**, Sensitivity of predictor 3 of the pan-B-cell diagnostic algorithm (predictor 3 of Fig.  
993 3a) for the classification of MCL into the subtypes C1 or C2 while incrementing the  
994 number of CpGs.

995 **d**, Sensitivity of predictor 4 of the pan-B-cell diagnostic algorithm (predictor 4 of Fig.  
996 3a) for the classification of CLL into the subtypes n-CLL, i-CLL or m-CLL while  
997 incrementing the number of CpGs.

998 **e**, Sensitivity of predictor 5 of the pan-B-cell diagnostic algorithm (predictor 5 of Fig.  
999 3a) for the classification of DLBCL into the subtypes ABC and GCB while incrementing  
1000 the number of CpGs.

1001

#### 1002 **Extended Data Fig.4**

1003 **a**, Variability of DNA methylation changes (IQR) in normal neoplastic B cells against the  
1004 median number of DNA methylation changes.

1005 **b**, Correlations of B-cell independent DNA methylation changes in B-cell tumors  
1006 against B-cell related changes for hypermethylation (top) and hypomethylation  
1007 (bottom).

1008 **c**, Number of B-cell related or B-cell independent hyper- or hypomethylation in B-cell  
1009 tumors (Methods).

1010 **d**, B-cell independent CpGs losing DNA methylation in B-cell tumors and the  
1011 percentages in each chromatin state in normal and neoplastic B-cells.

1012 **e**, Example CpGs from **d**, in normal and neoplastic B-cells.

1013 **f**, Density of genes distributed along gene expression percentiles of genes associated  
1014 with B-cell independent CpGs losing DNA methylation in B-cell tumors in each B-cell  
1015 tumor subtype. Expressed genes are displayed at right as control (with presence of  
1016 H3K36me3). Means within each B-cell subpopulation as well as B-cell tumors are  
1017 represented.

1018 **g**, B-cell independent CpGs gaining DNA methylation in B-cell tumors and the  
1019 percentages in each chromatin state in normal and neoplastic B-cells.

1020 **h**, Example CpGs from **g**, in normal and neoplastic B-cells.

1021 **i**, Density of genes distributed along gene expression percentiles of genes associated  
1022 with B-cell independent CpGs gaining DNA methylation in B-cell tumors in each B-cell  
1023 tumor subtype. Expressed genes are displayed at right as control (with presence of  
1024 H3K36me3). Means within each B-cell subpopulation as well as B-cell tumors are  
1025 represented.

1026

1027 **Extended Data Fig.5.**

1028 **a**, Correlations between epiCMIT-hyper and epiCMIT-hypo with other  
1029 hypermethylation-based mitotic clocks including epiTOC (epigenetic Timer for Cancer  
1030 risk) and MiAge as well as the CIMP (CpG hypermethylator phenotype, not formally  
1031 conceived as mitotic clock). epiCMIT, epigenetically-determined Cumulative MIToses.

1032 **b**, Poor effect of age in epiCMIT in normal B cells. epiCMIT correlation with age in naïve  
1033 B cells from healthy infants, young-adults and older adults. Horvath model correctly  
1034 predicted the real age. epiCMIT and Horvath are poorly correlated.

1035 **c**, Poor effect of age in epiCMIT in B-ALL. Wide epiCMIT spectrum in children with B-  
1036 ALL.

1037 **d**, Correlation between the number of mutations detected by WGS against epiCMIT in  
1038 CLL subtypes with different cellular origin (n-CLL, i-CLL and m-CLL).

1039 **e**, Mutational signatures for 138 CLL samples with available WGS and DNA methylation  
1040 data divided into different subtypes of CLL with different cellular origin, namely n-CLL,  
1041 i-CLL and m-CLL.

1042 **f**, Correlation of epiCMIT with Ki67 in nodal MCL patients.

1043 **g**, Gene expression signatures resulting after GSEA analysis related to proliferation in  
1044 CLL samples with low and high epiCMIT.

1045 **h**, Gene expression signatures resulting after GSEA analysis related to proliferation in  
1046 ALL samples with low and high epiCMIT.

1047

1048 **Extended Data Fig.6.**

1049 **a**, epiCMIT interpretation in normal and neoplastic B cells. Mitotic cell division occurs  
1050 in normal B cell development and DNA methylation changes accumulate at repressed  
1051 regions (blue component of the epiCMIT on the x axis). B-cell tumors arise from  
1052 different maturation stages, and thus they contain different baseline epiCMIT from the  
1053 cell of origin from which they originate (blue bar in B-cell tumors). When B-cell tumors  
1054 progress, they acquire additional DNA methylation changes at repressed regions  
1055 (shown as red component of the epiCMIT). Notably, these new DNA methylation

1056 changes occur in both axes, i.e. changes occurring in normal B cell maturation as well  
1057 as new B-cell independent changes. This concept is shown with real data at Fig. 4b.

1058 **b**, Multivariate cox regression model for overall survival in ALL for epiCMIT against  
1059 cytogenetic groups. Hazard ratio for epiCMIT correspond to 0.1 increments.

1060 **c**, Multivariate cox regression model for time to first treatment in CLL samples near  
1061 diagnosis (30 months) for epiCMIT against age, number of driver alterations and  
1062 epigenetic groups based on different cellular origin. At right is shown the multivariate  
1063 cox regression model for validation series. Hazard ratio for epiCMIT correspond to 0.1  
1064 increments.

1065 **d**, Multivariate cox regression model in CLL for overall survival for epiCMIT against age,  
1066 number of driver alterations and epigenetic groups for the initial and validation series  
1067 (left and right, respectively). Treated and untreated patients were included in the  
1068 validation series. Hazard ratio for epiCMIT correspond to 0.1 increments.

1069 **e**, Kaplan-Meyer curves for DLBCL separated by ABC and GCB groups and low and high  
1070 epiCMIT groups based on maxstat rank statistics. Multivariate cox regression model  
1071 treating epiCMIT as continuous variable is shown at bottom. Hazard ratio for epiCMIT  
1072 correspond to 0.1 increments.

1073

1074 **Extended Data Fig.7.**

1075 **a**, Oncoprint showing all genetic driver alterations considered in CLL grouped by  
1076 epigenetic subgroups and ordered according to increasing levels of epiCMIT (from left  
1077 to right within each epigenetic subgroup). Other clinicobiological features including  
1078 MBL or CLL, IGHV status, Age, Binet stage, epiCMIT subgroups based on Fig. 5C, need  
1079 for treatment and patient status are shown. Distinct genetic driver alterations are

1080 depicted with different colors and shapes. The percentage of mutated patients as well  
1081 as barplots showing the number of mutated patients for each alteration is shown at  
1082 right.

1083 **b**, Driver genetic alterations without clear associations with epiCMIT. Analyses were  
1084 done globally for all CLL samples (although adjusted by epigenetic groups) as well as  
1085 within each epigenetic subgroup. Positive point estimates relate to positive  
1086 associations with epiCMIT. 95% confidence intervals are shown with colors coding for  
1087 FDR corrections. Number of patients with each genetic driver alteration is shown at  
1088 bottom.

1089



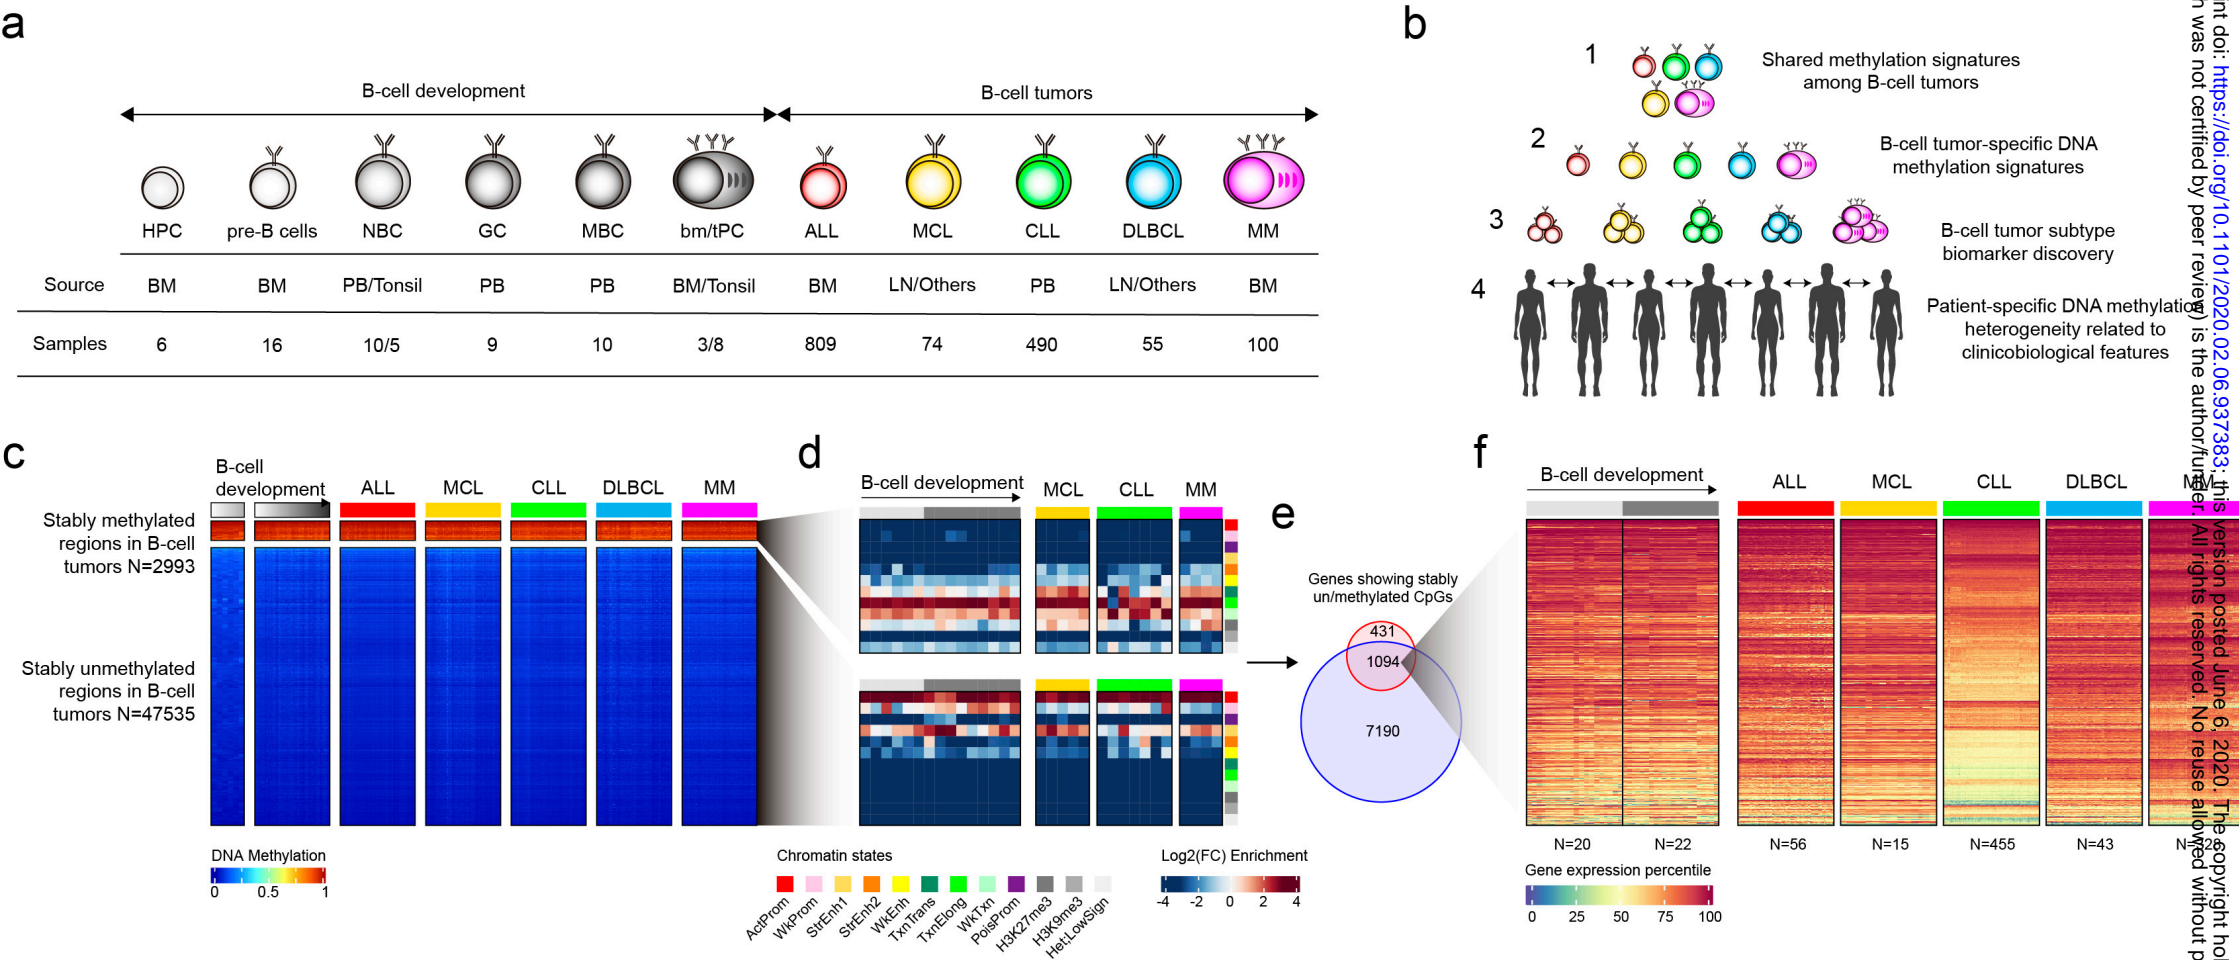

**Fig. 1**

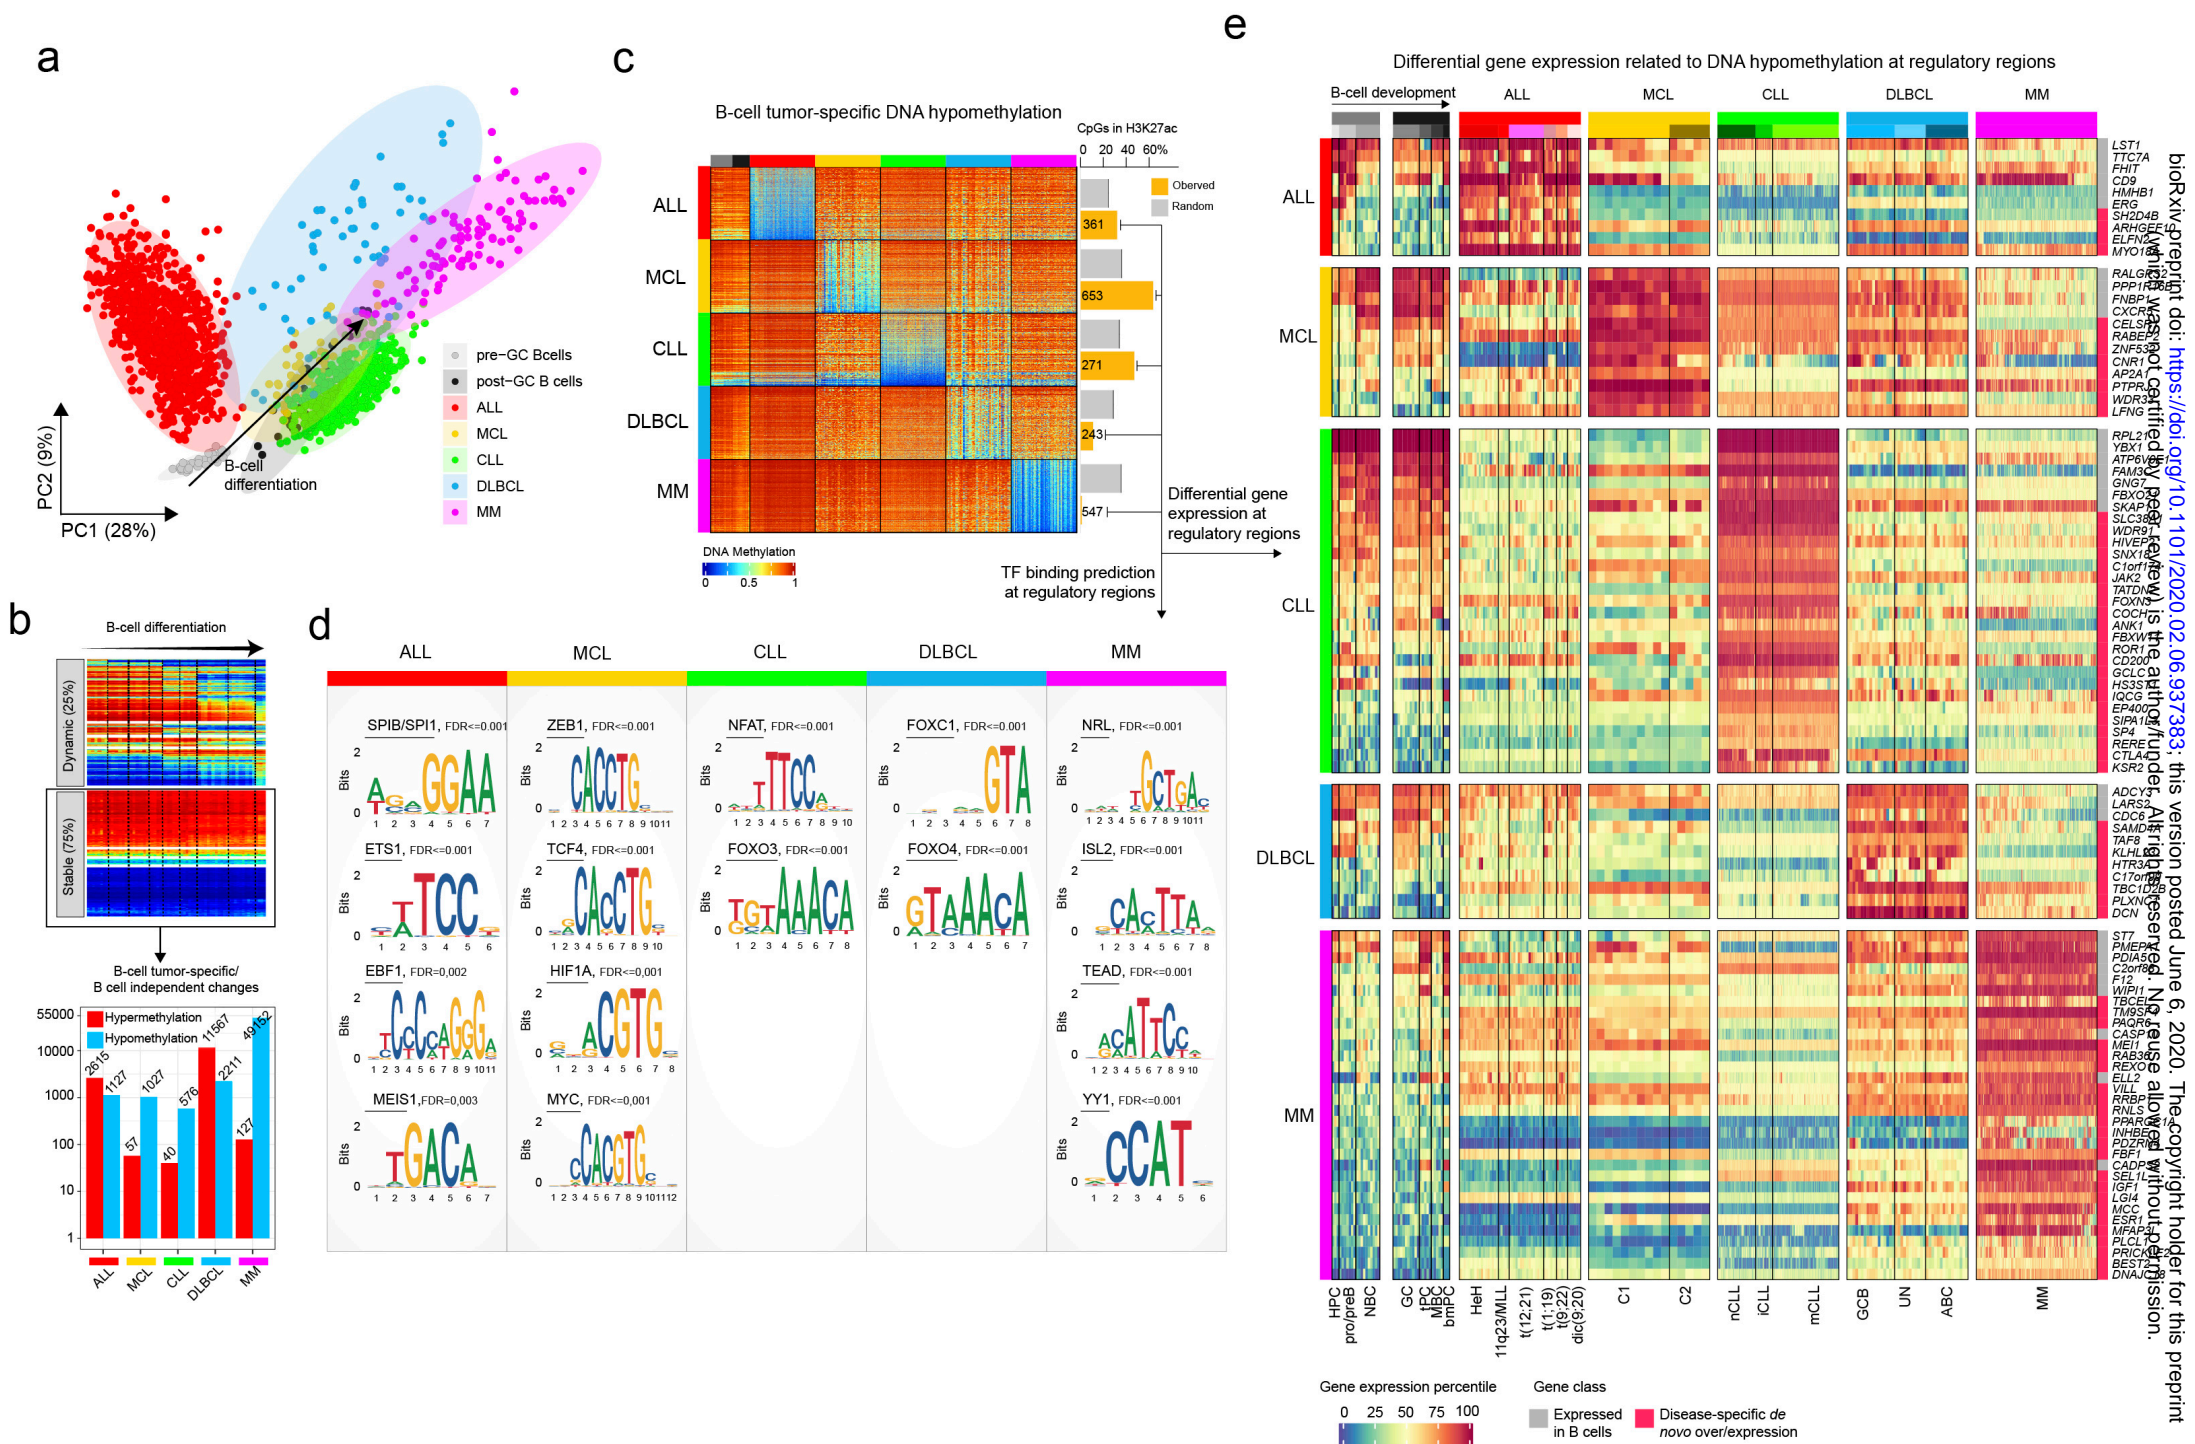

Fig. 2



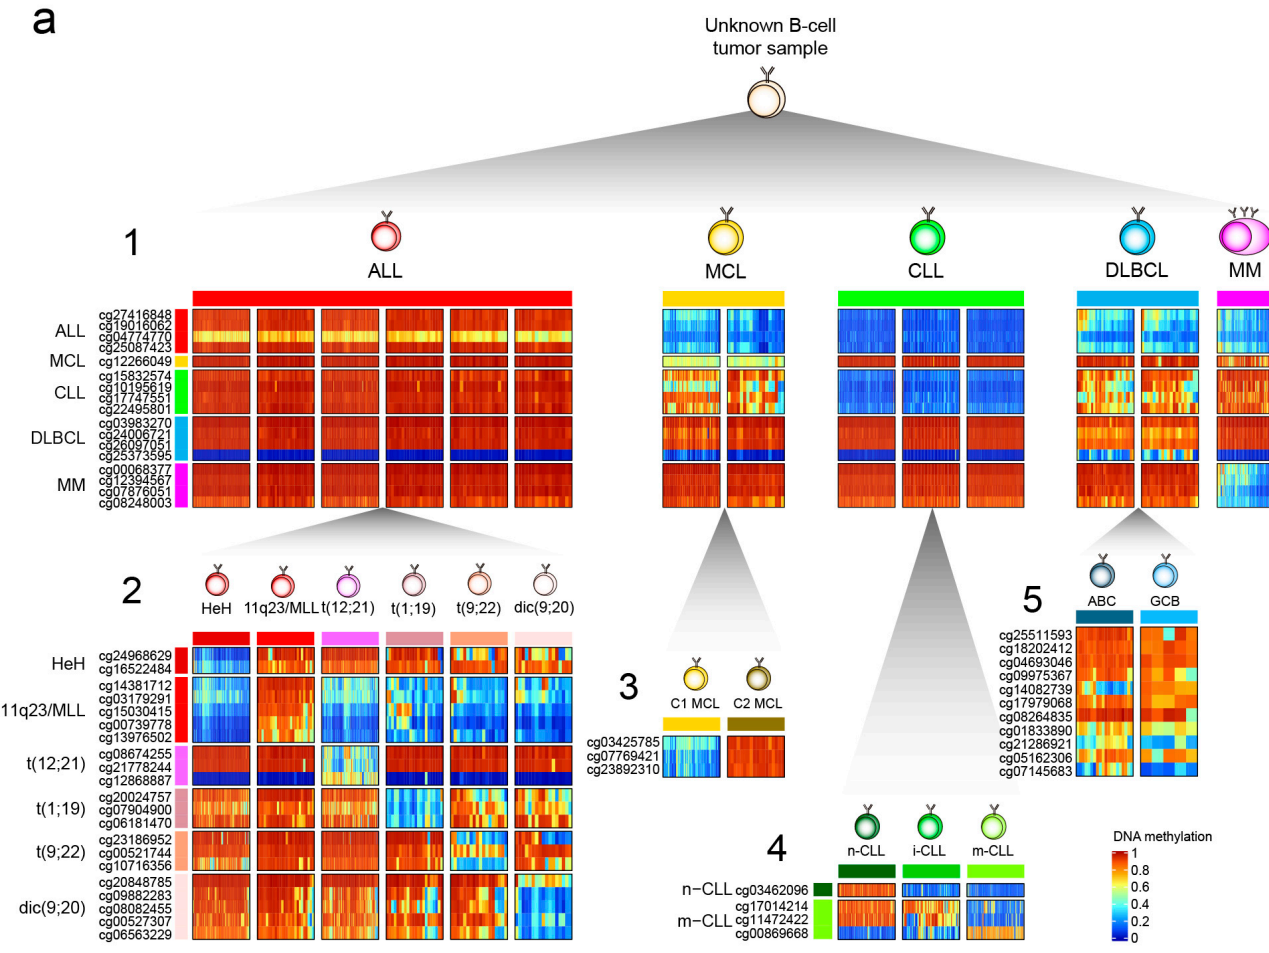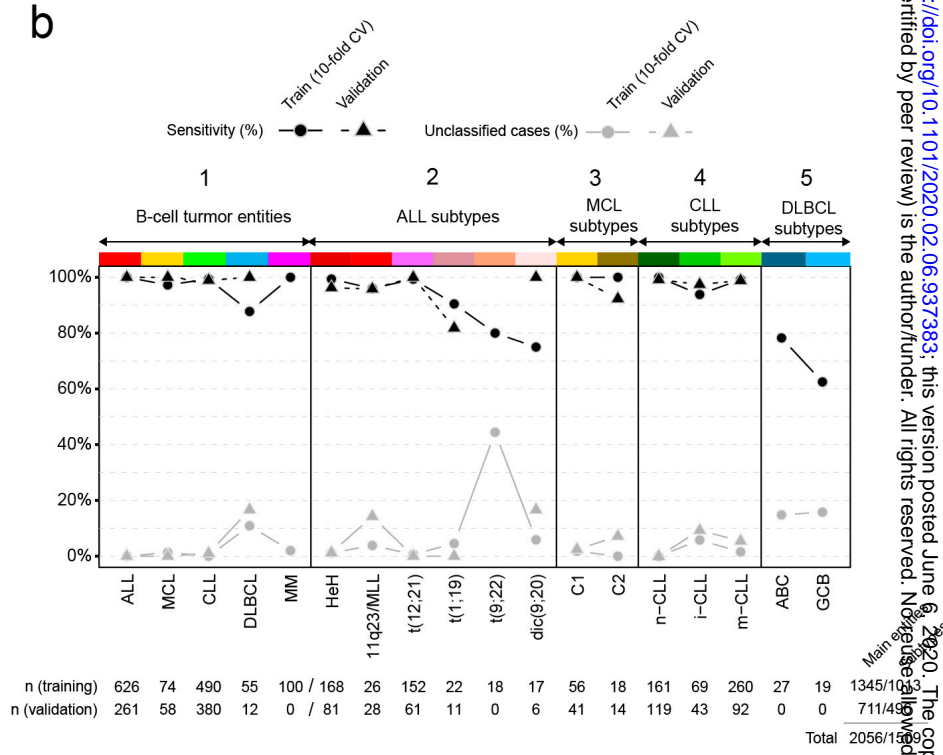

**Fig. 3**

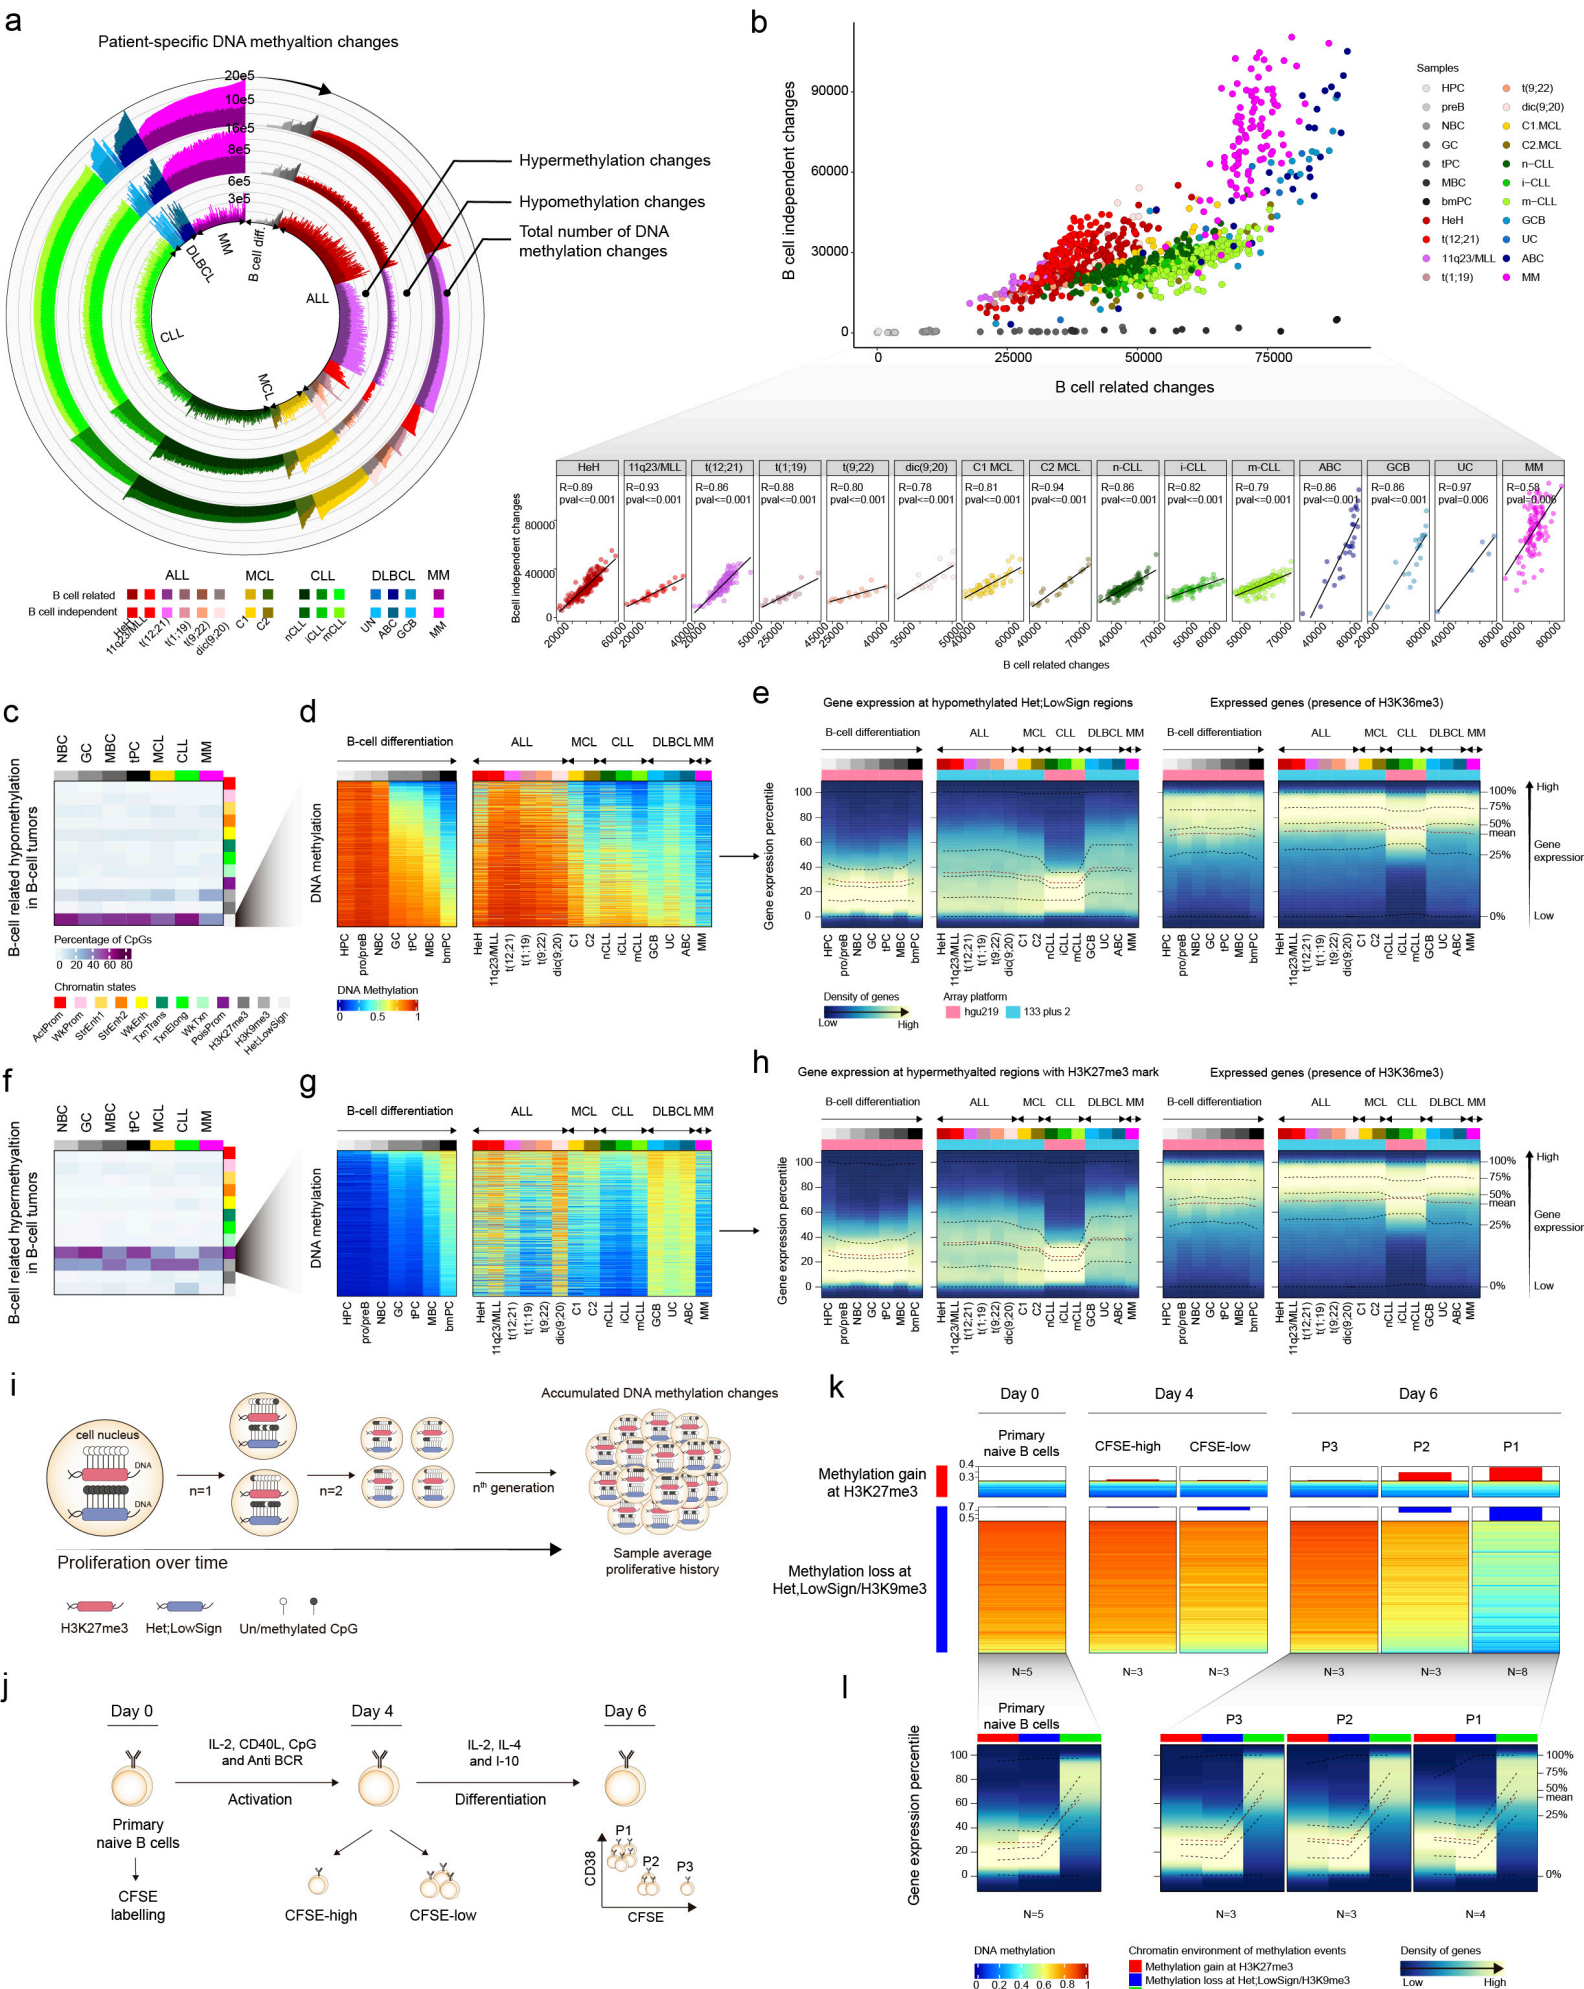

Fig. 4

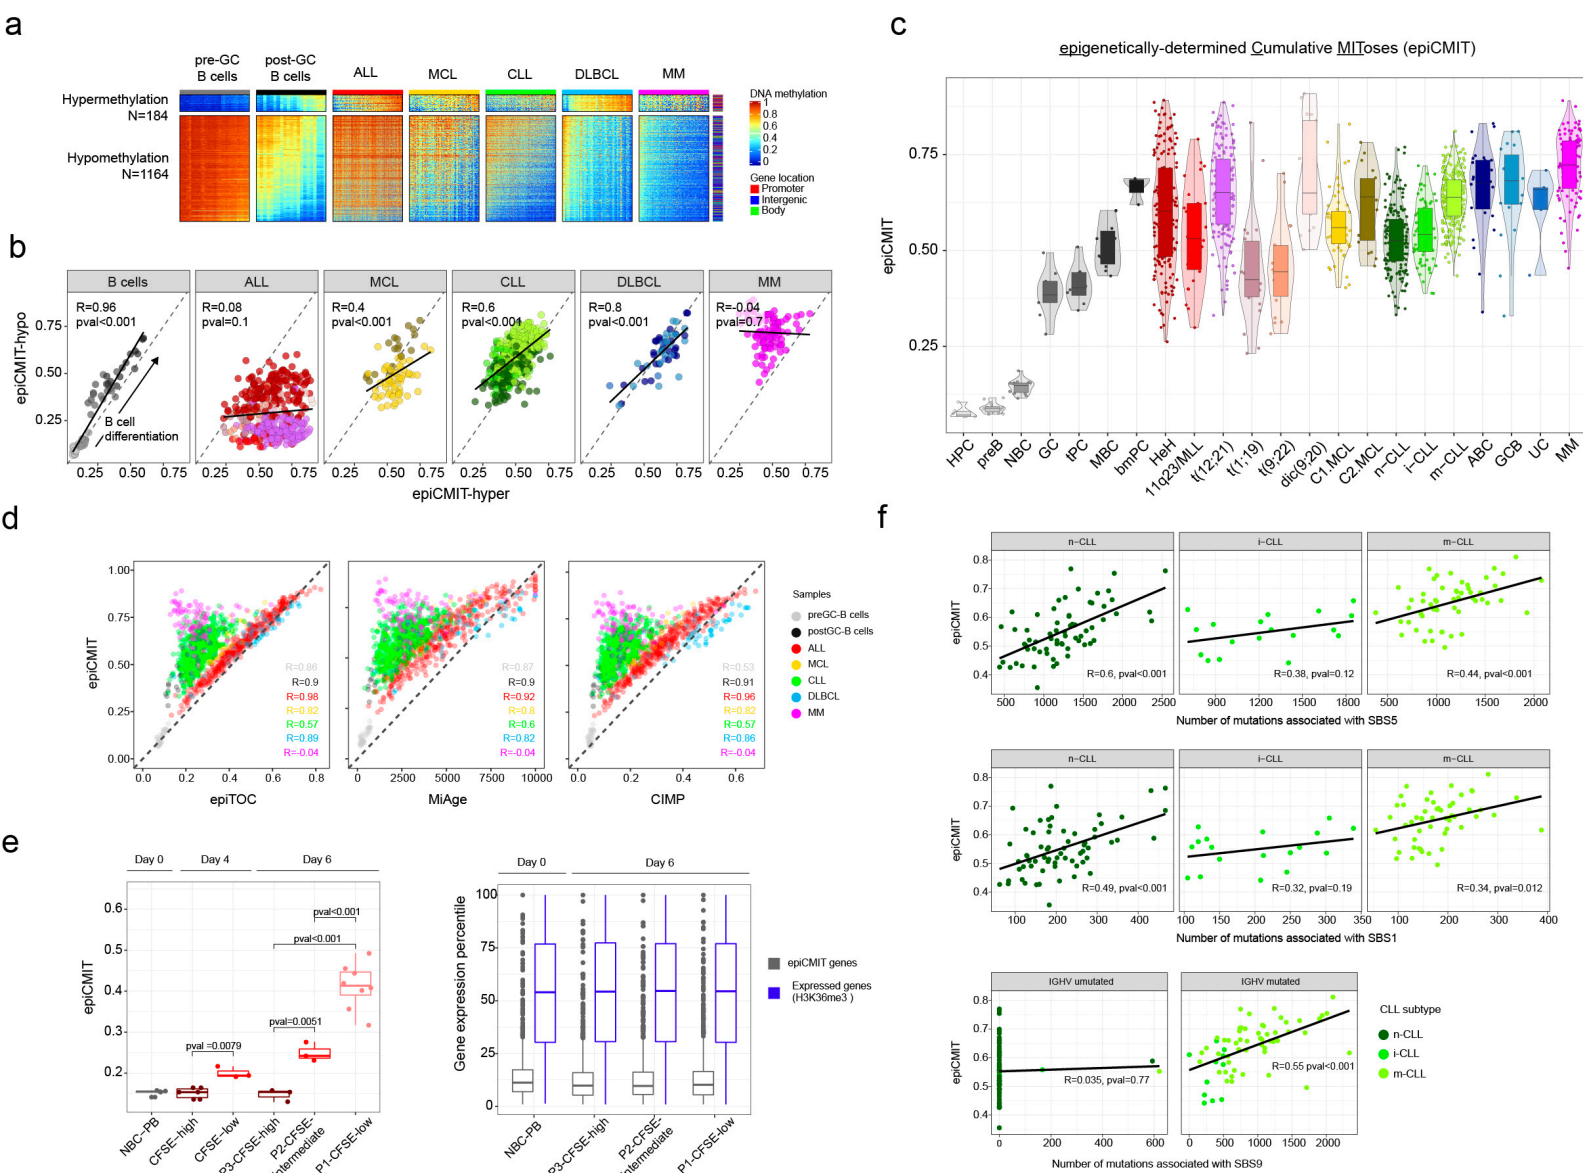

Fig. 5



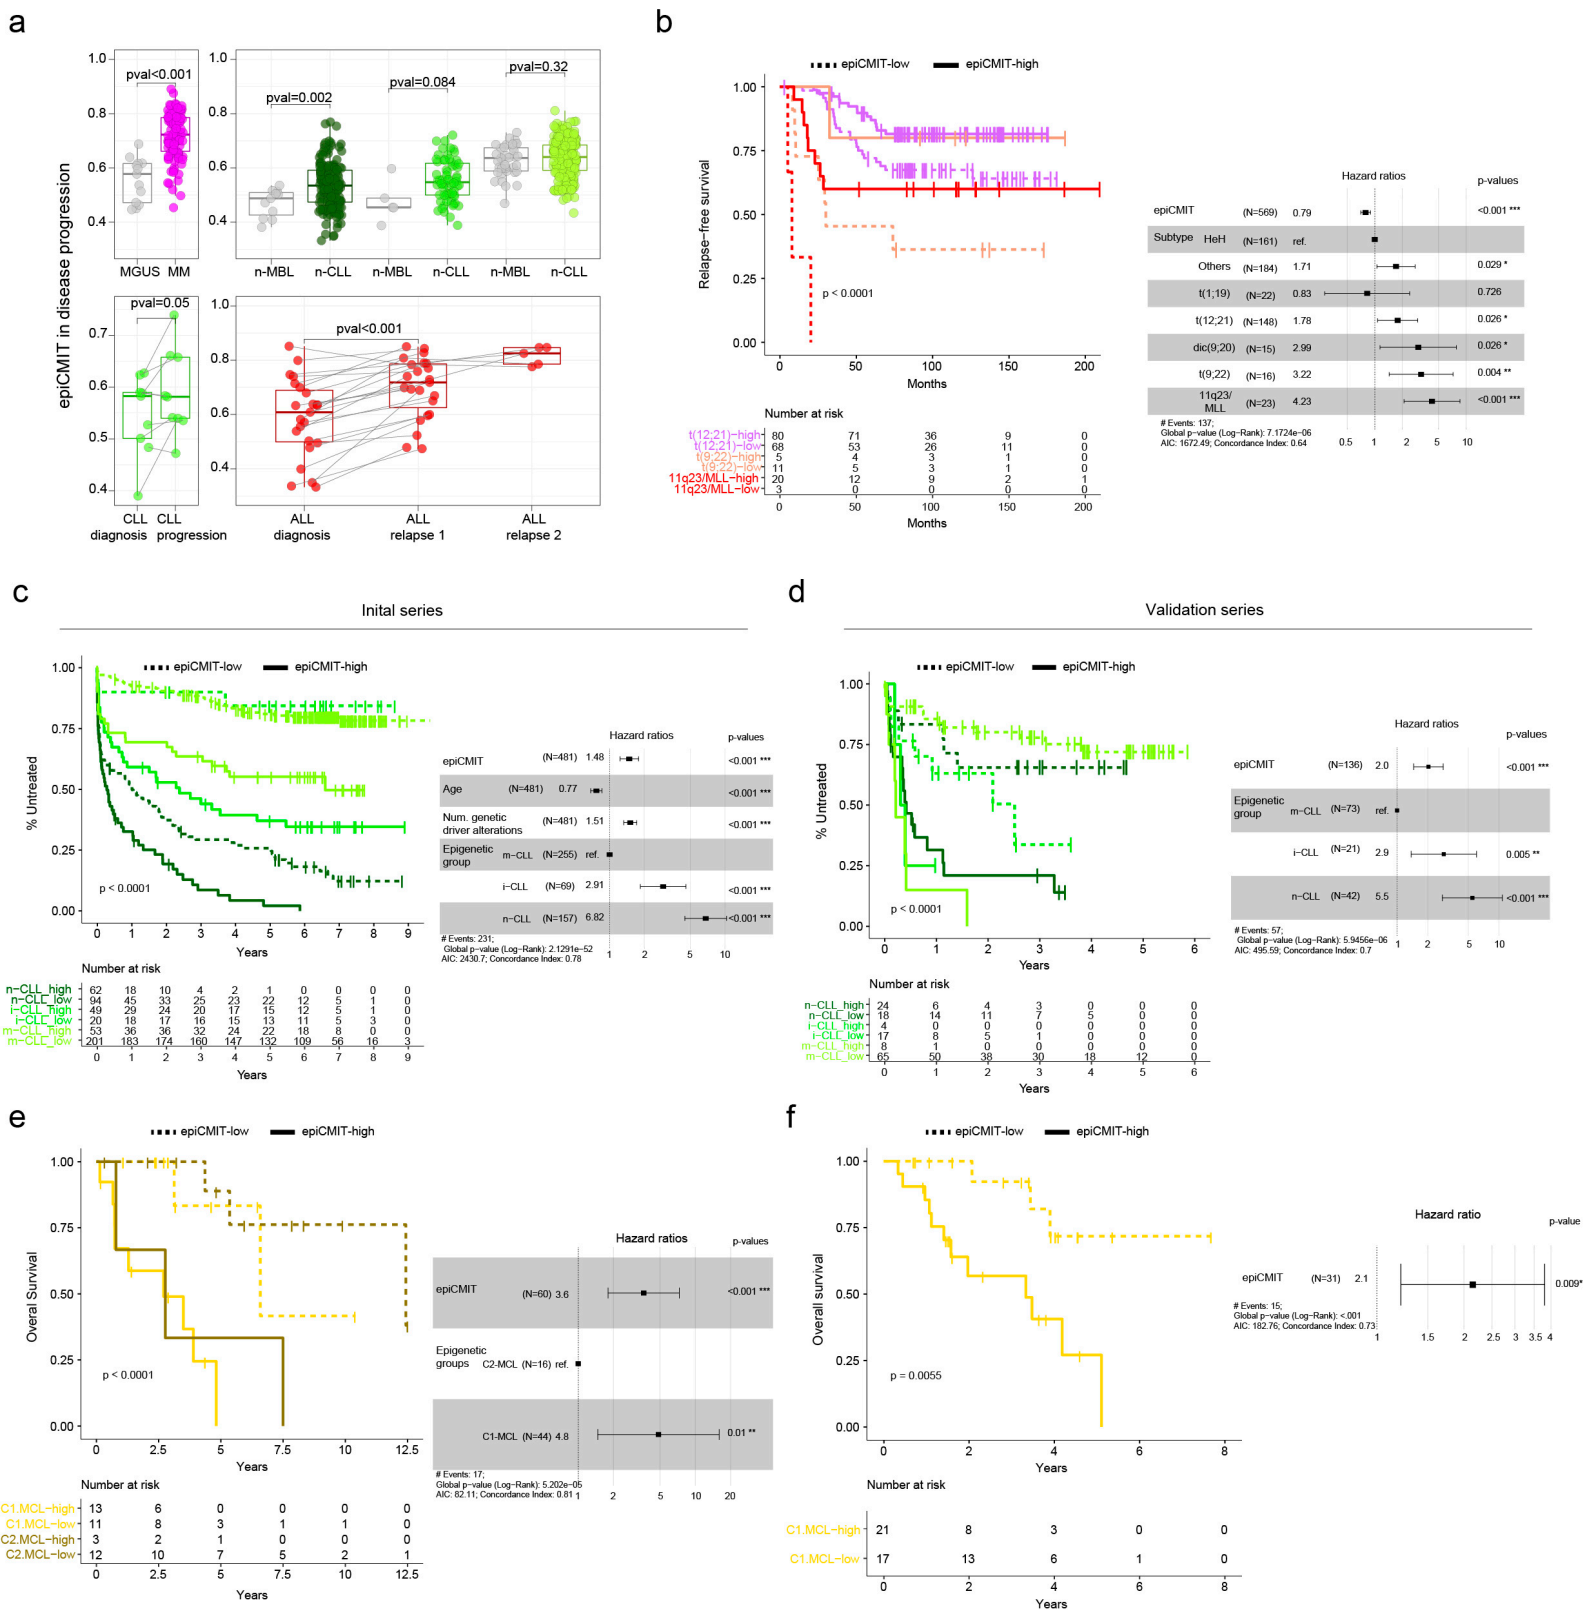

Fig. 6

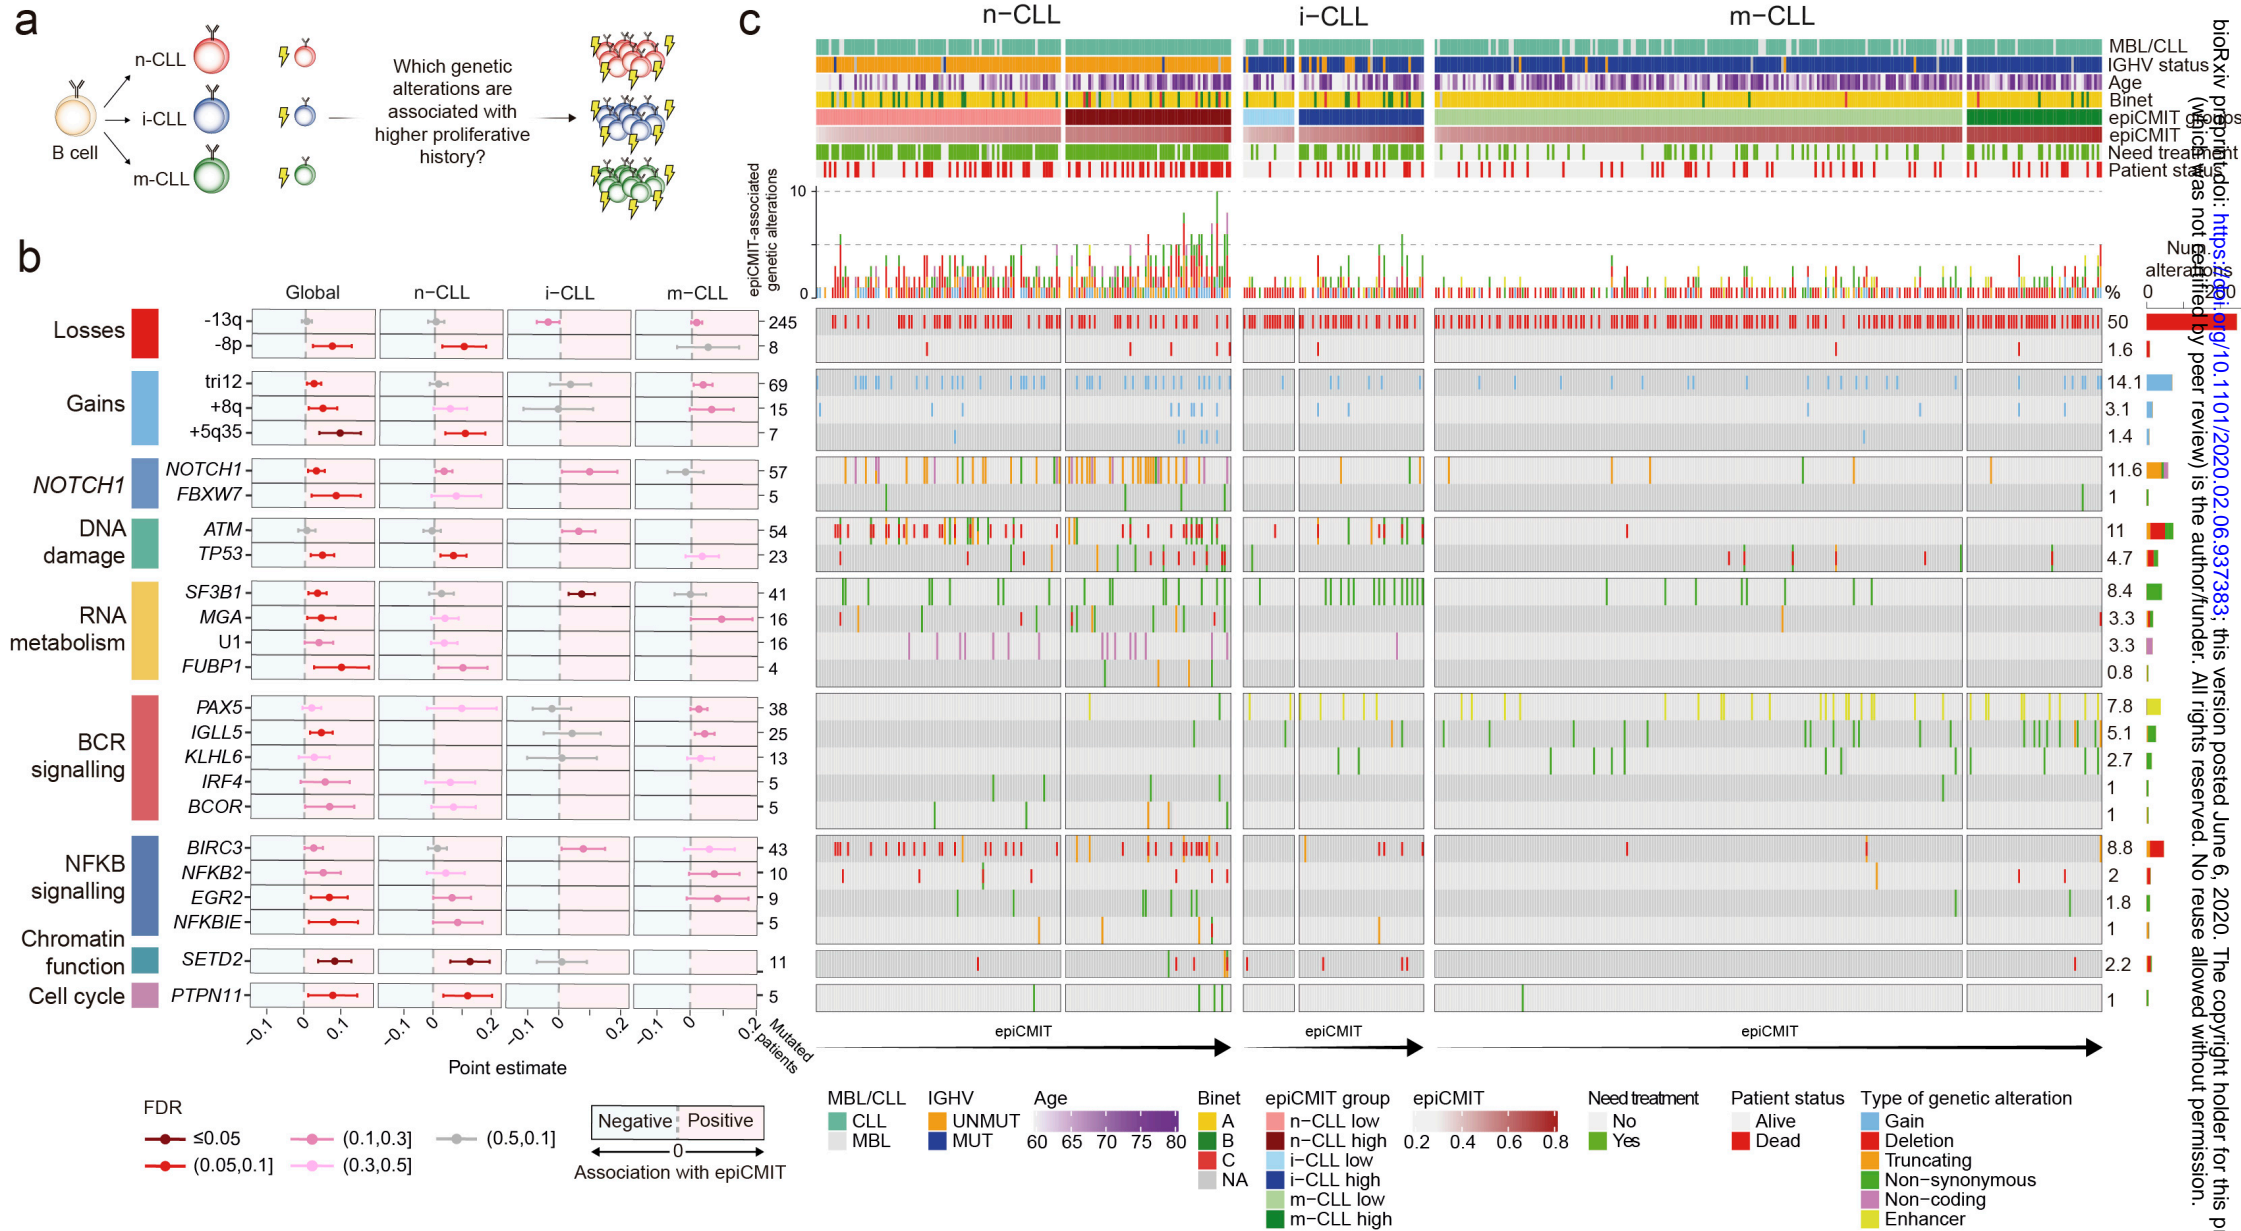

Fig. 7

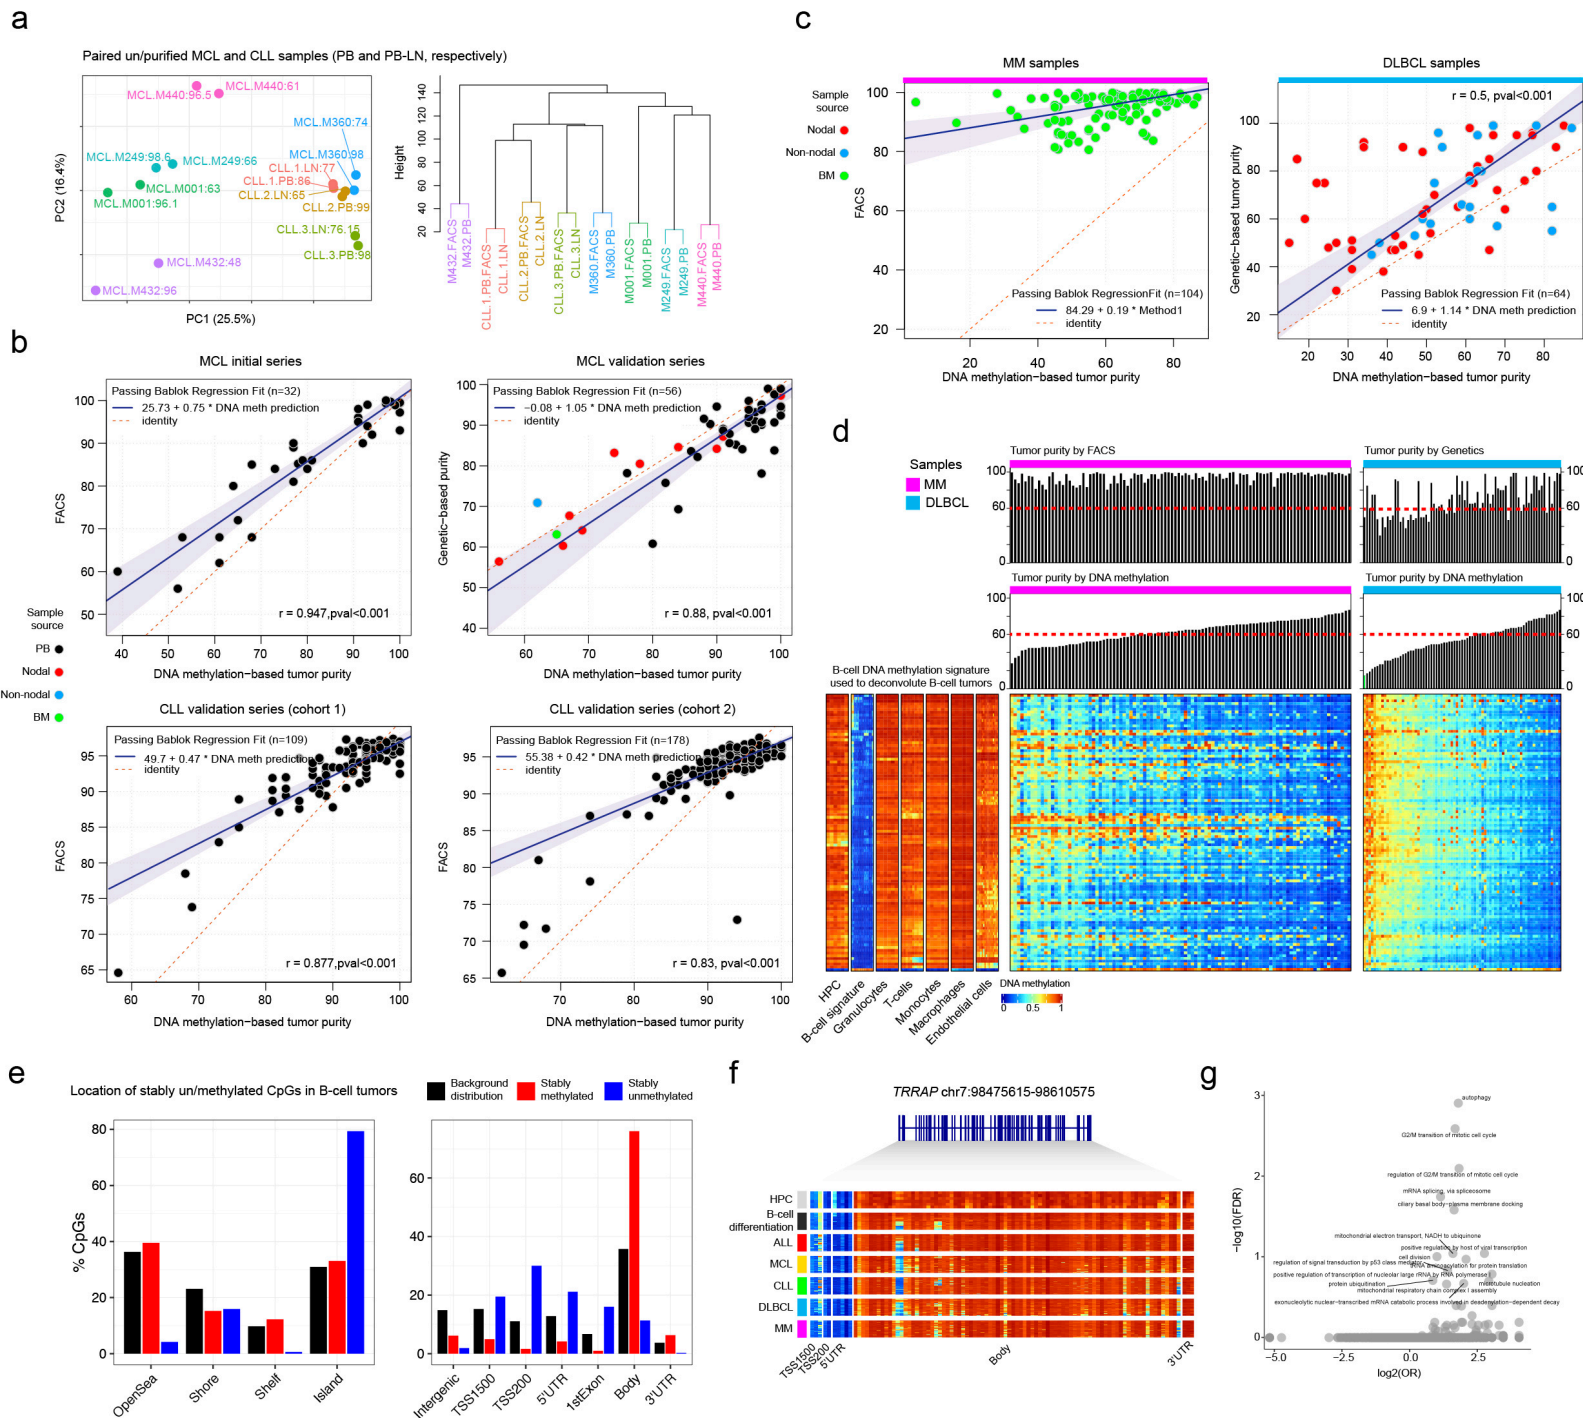

Extended Data Fig.1



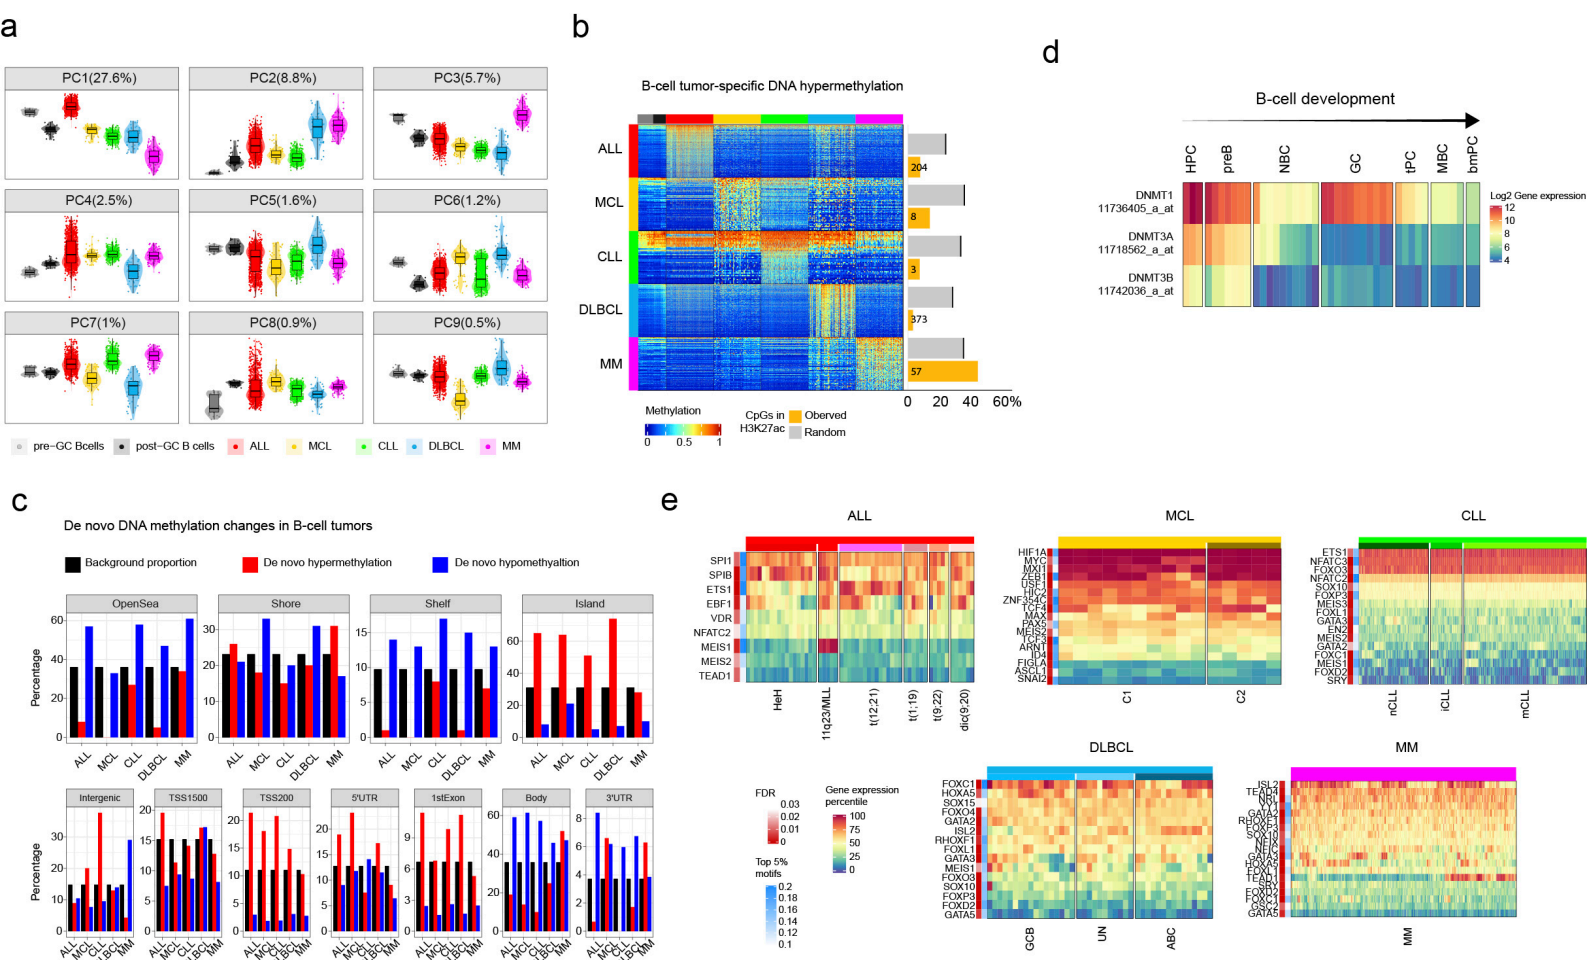

Extended Data Fig. 2

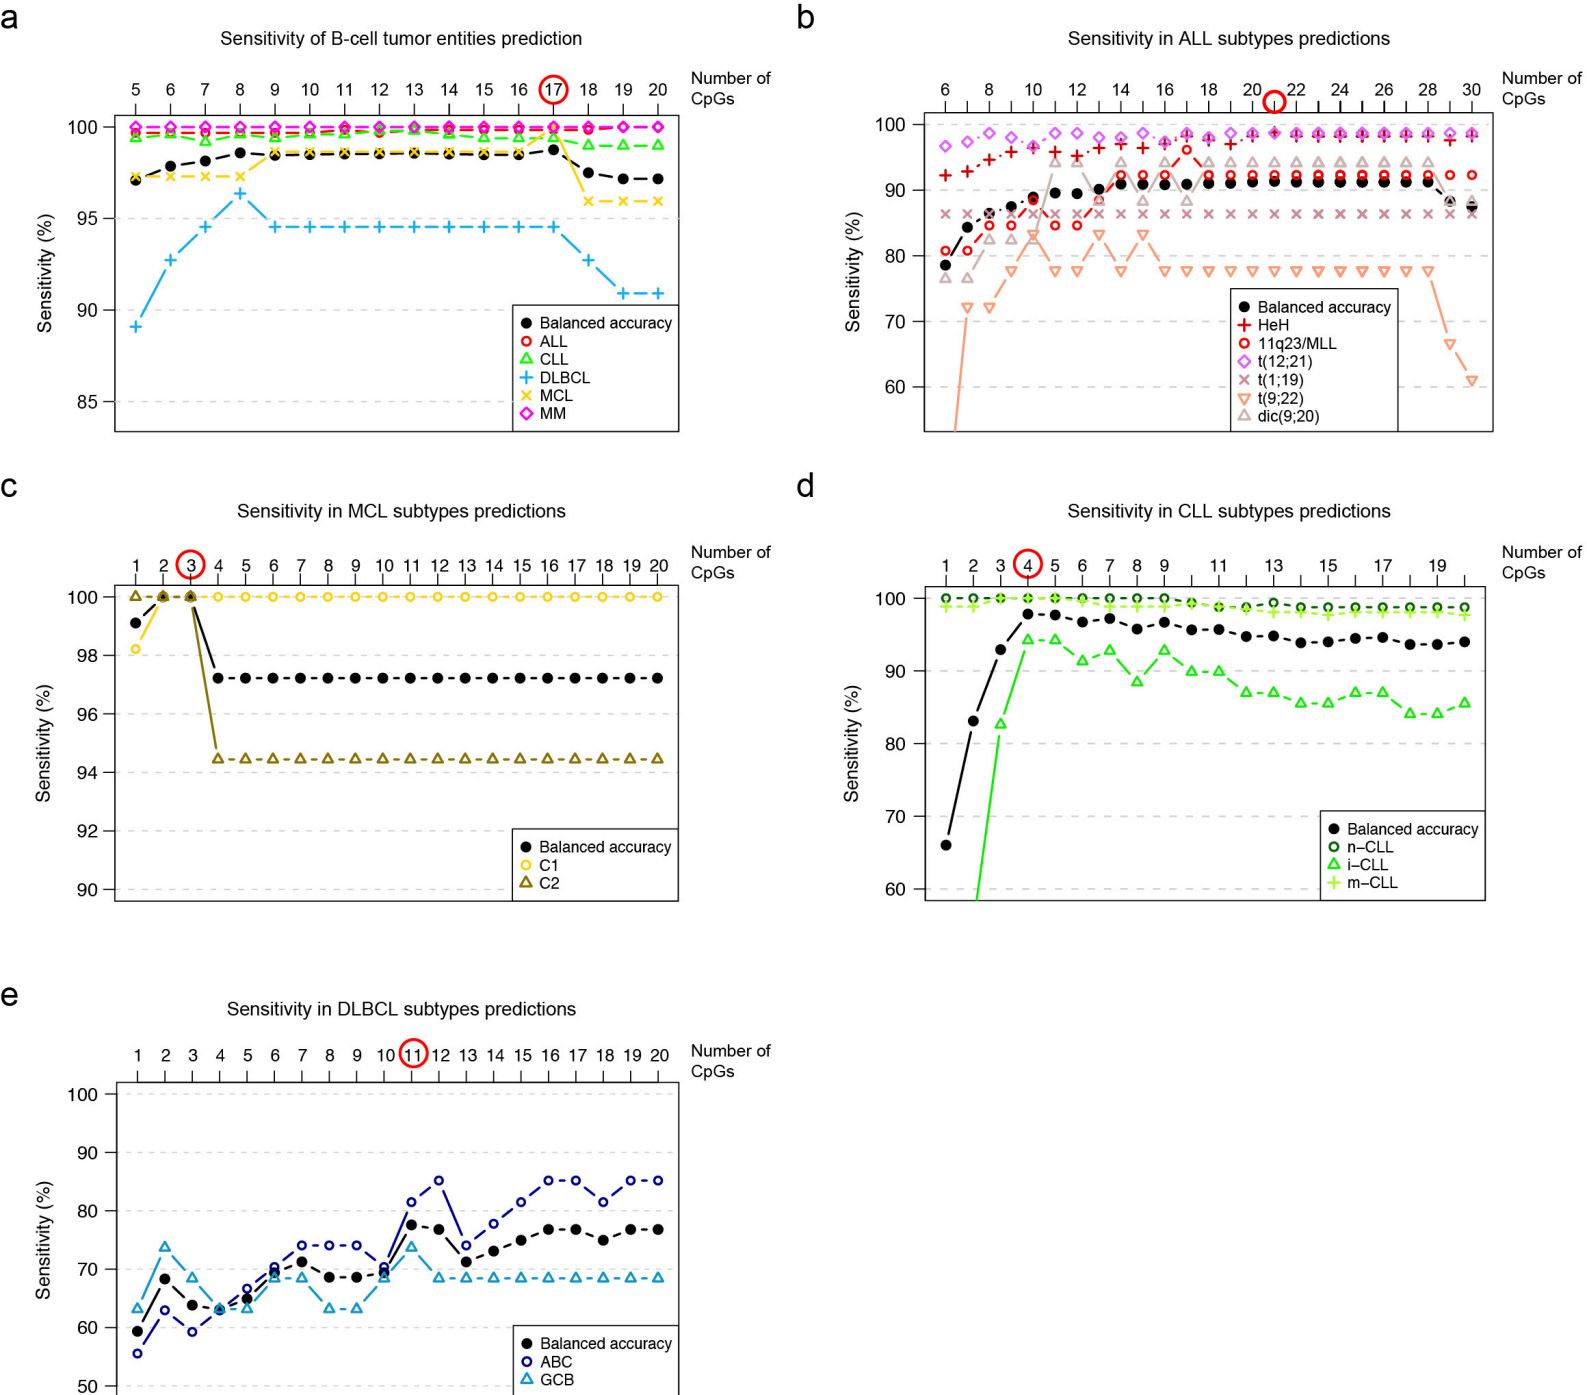

Extended Data Fig. 3

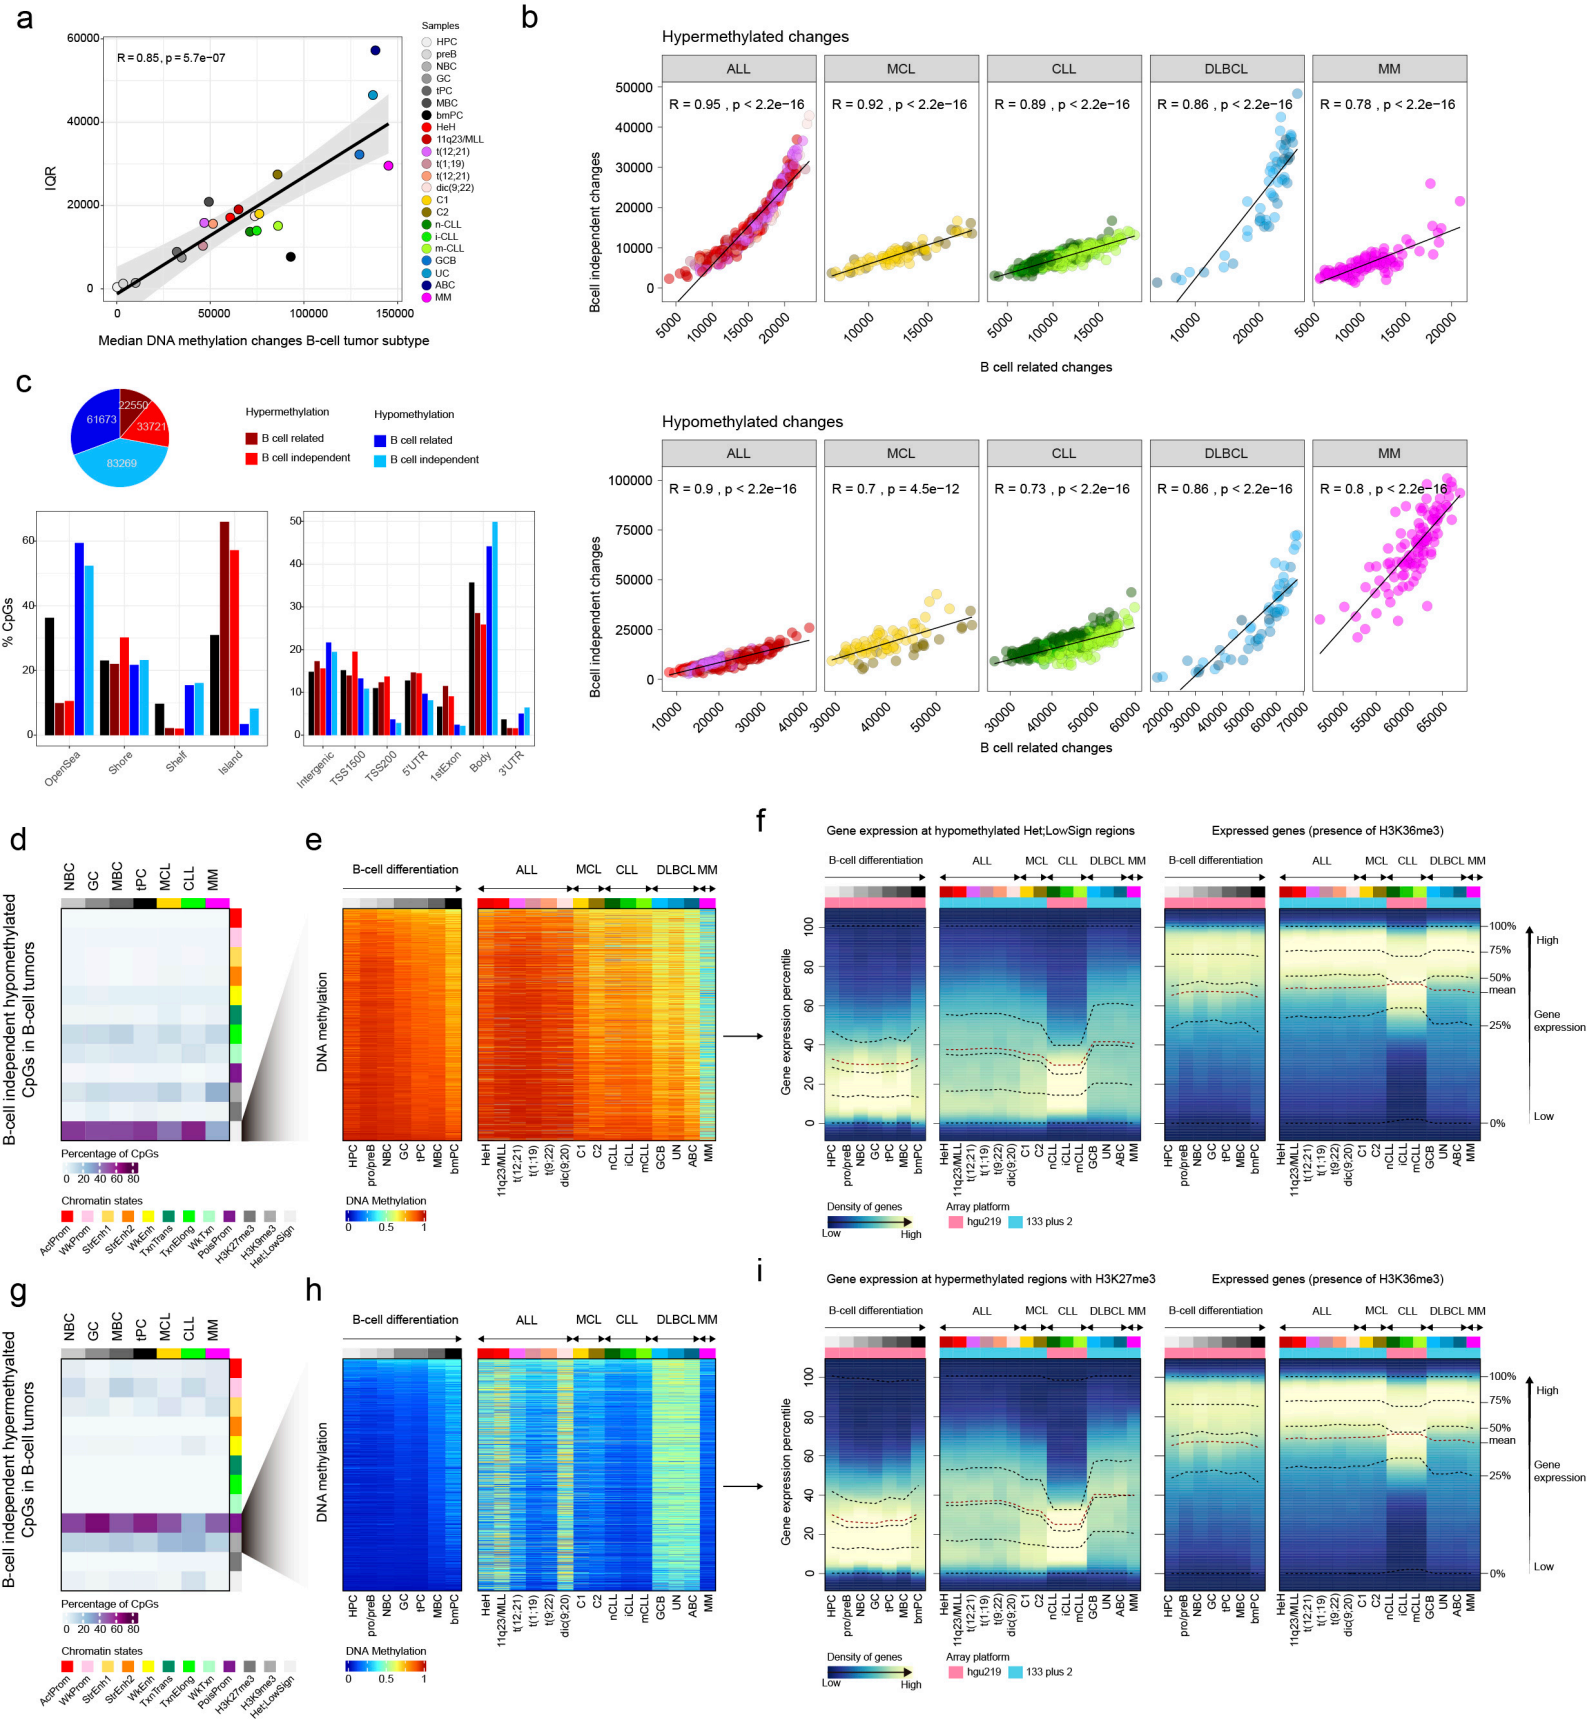

Extended Data Fig. 4



**a**

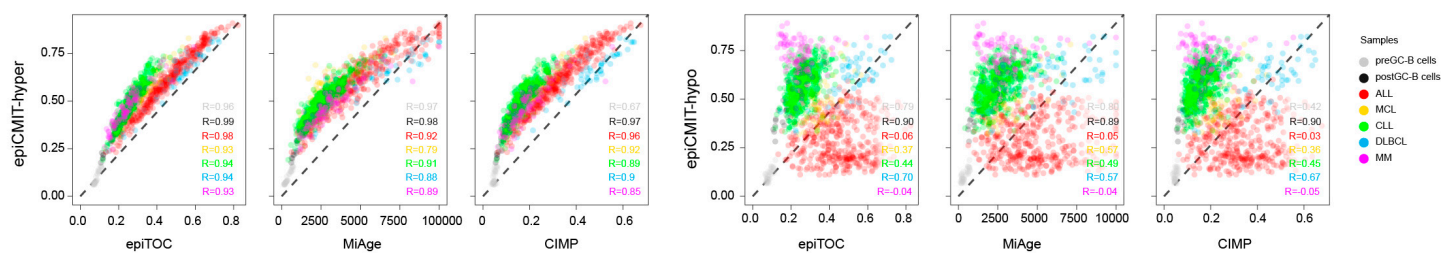

**b**

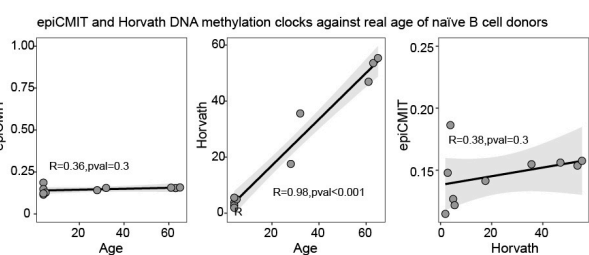

**c**

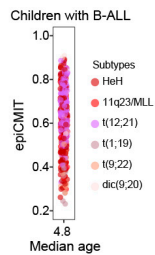

**e**

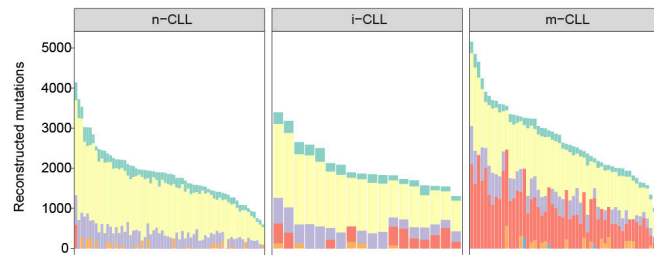

**d**

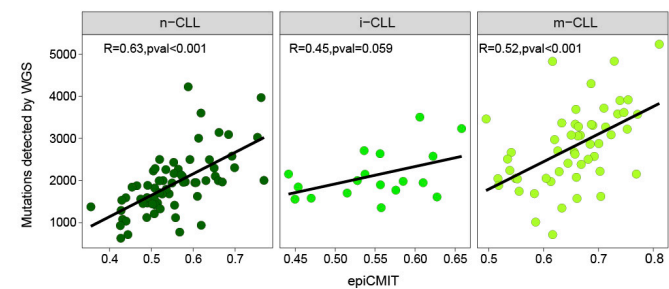

**f**

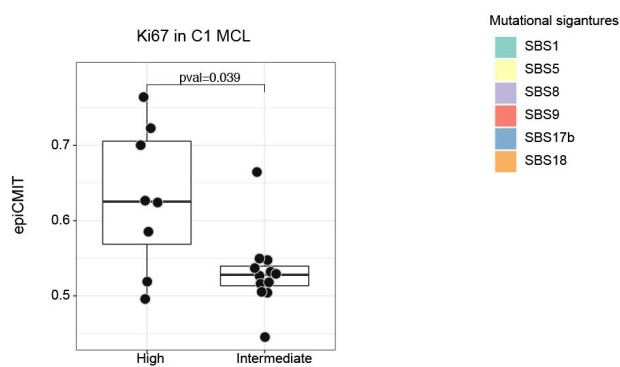

**g**

Gene expression signatures related to proliferation in n-CLL

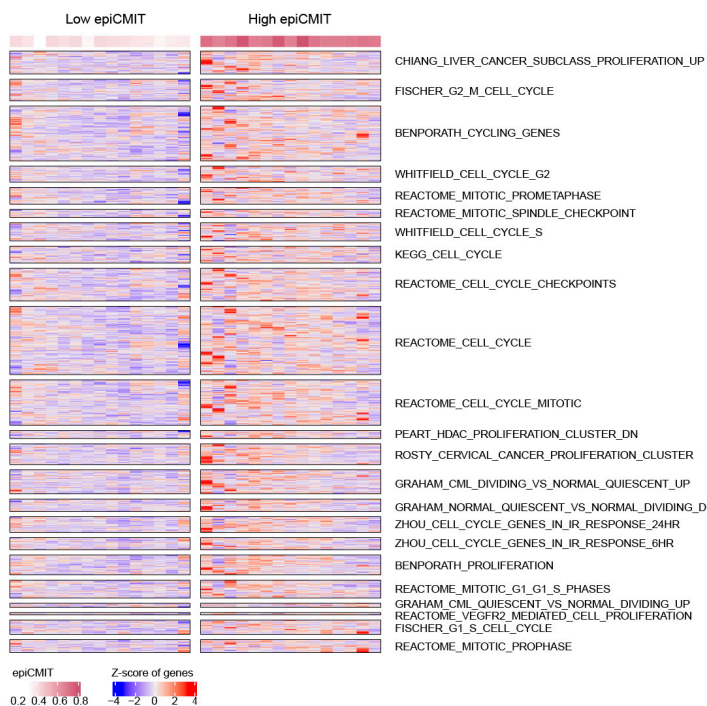

**h**

Gene expression signatures related to proliferation in HeH ALL

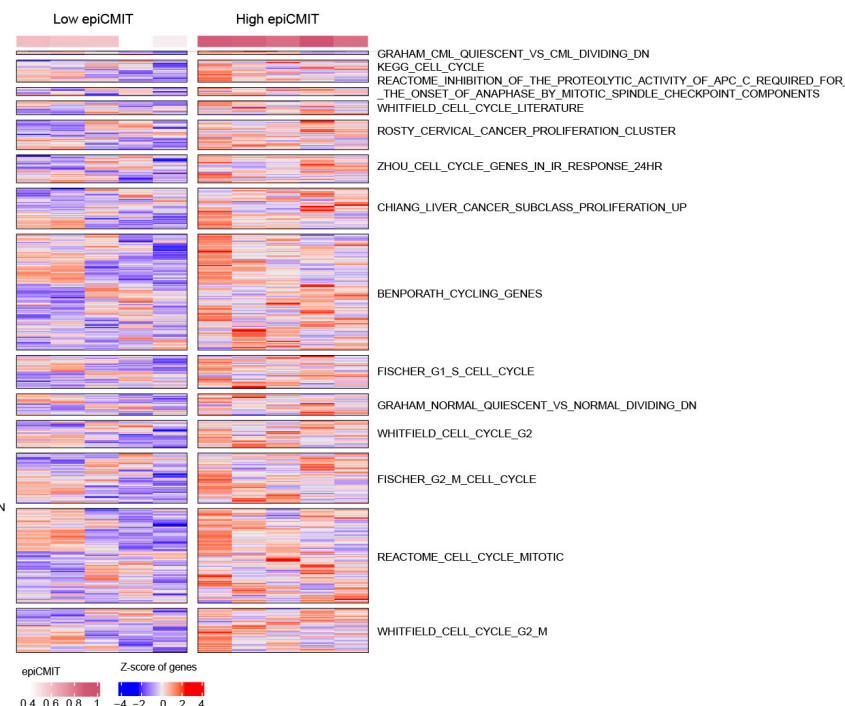

**a**

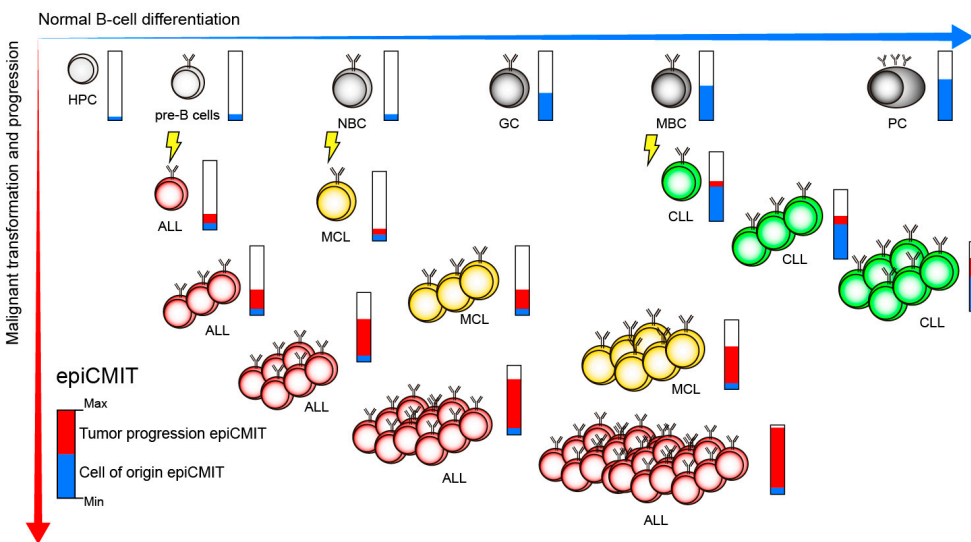

**b**

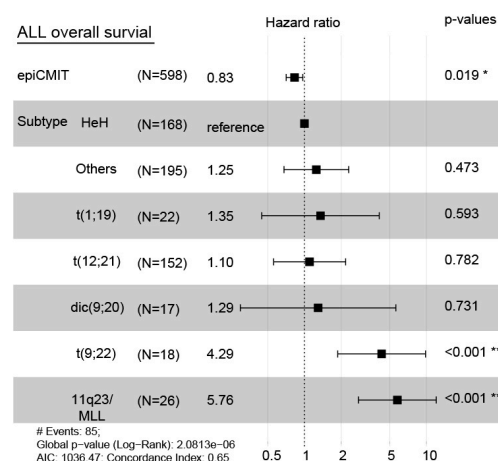

**c**

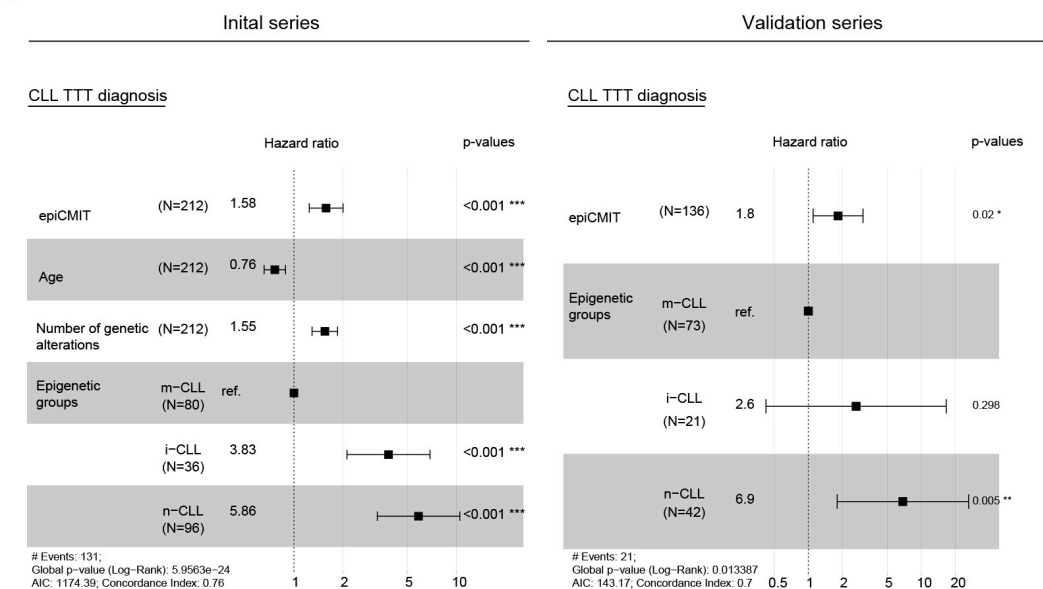

**e**

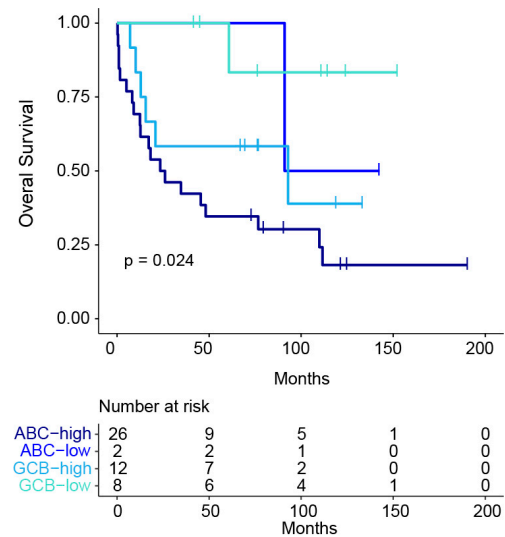

**d**

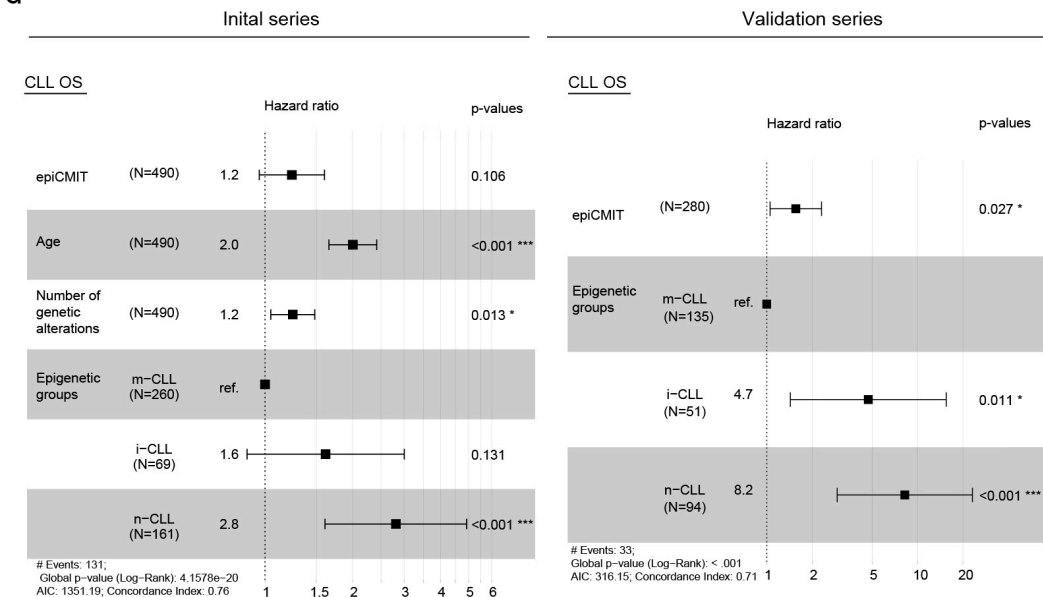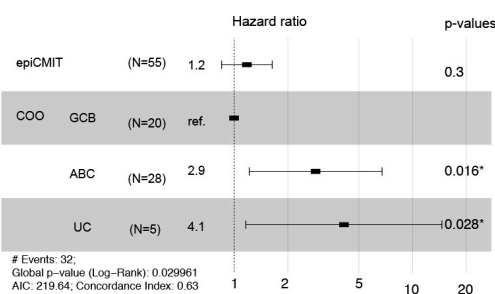

Source: https://www.biorxiv.org/content/10.1101/2020.02.06.937383v3.full.pdf
